# Supplementary material for: Modeling knot features using branch scars from Mongolian oak (Quercus mongolica)
Source: PeerJ. 2023 Jan 31;11:e14755. doi: 10.7717/peerj.14755 (PMC9897063; doi:10.7717/peerj.14755)
Supplement: Supplemental Information 2 [file peerj-11-14755-s002.xlsx]

## Sheet: Lk
Quantiles	1	0.95	0.0075	0.005
0.561667	70.7832
0.305	46.9013
0.624167	45.6654
0.18625	44.0374
0.358	42.7226
0.262222	39.5831
0.289091	38.5719
0.4625	36.0176
0.74625	35.33
0.223333	33.0823
0.382727	32.7863
0.504167	32.4197
0.262222	32.3765
0.78	32.3547
0.597	32.2223
0.319167	31.8788
0.108	30.8713
0.579167	30.7972
0.42625	29.9162
0.603333	29.8479
0.879167	29.2956
0.324167	29.1077
0.2525	29.0036
0.500833	28.644
0.206	28.2793
0.0453333	28.0431
0.622222	28.0384
0.364	27.8097
0.258	27.592
0.405833	27.4988
0.828182	27.3963
0.330833	27.2673
0.58125	26.6374
0.0772727	26.4407
0.734167	26.1734
0.567778	26.1374	26.1374
0.063	25.9096	25.9096
0.048	25.6993	25.6993
0.579167	25.4903	25.4903
0.305556	25.1533	25.1533
0.478667	25.0509	25.0509
0.312222	25.0495	25.0495
0.843333	24.932	24.932
0.387273	24.9221	24.9221
0.164444	24.5467	24.5467
0.751111	24.4532	24.4532
0.225556	24.1142	24.1142
0.7675	24.099	24.099
0.766667	23.8333	23.8333
0.465556	23.811	23.811
0.871667	23.759	23.759
0.61	23.7301	23.7301
0.256	23.713	23.713
0.3	23.5935	23.5935
0.207778	23.5663	23.5663
0.734444	22.8953	22.8953
0.282222	22.8508	22.8508
0.747778	22.8085	22.8085
0.351667	22.7666	22.7666
0.9325	22.7263	22.7263
0.111	22.6343	22.6343
0.0763636	22.3791	22.3791
0.063	22.3657	22.3657
0.218333	22.3489	22.3489
0.790833	22.2831	22.2831
0.363	22.1454	22.1454
0.873	21.9542	21.9542
0.784167	21.853	21.853
0.103	21.8169	21.8169
0.7875	21.7787	21.7787
0.836667	21.6409	21.6409
0.297333	21.5103	21.5103
0.10475	21.4741	21.4741
0.0706667	21.3702	21.3702
0.612	21.3137	21.3137
0.534444	21.1833	21.1833
0.719167	20.3264	20.3264
0.683333	20.0892	20.0892
0.975	19.9371	19.9371
0.143636	19.7244	19.7244
0.438	19.7217	19.7217
0.905	19.7033	19.7033
0.505	19.6497	19.6497
0.174444	19.5495	19.5495
0.847778	19.4791	19.4791
0.240667	19.284	19.284
0.49	18.9667	18.9667
0.259091	18.848	18.848
0.8925	18.8391	18.8391
0.895556	18.8177	18.8177
0.617778	18.6013	18.6013
0.097	18.5342	18.5342
0.388	18.5115	18.5115
0.366667	18.4515	18.4515
0.271111	18.4163	18.4163
0.755556	18.3738	18.3738
0.7775	18.2163	18.2163
0.185556	18.2074	18.2074
	17.7019	17.7019
0.698889	17.2143	17.2143
0.278333	17.1925	17.1925
0.485455	17.1278	17.1278
0.192727	17.117	17.117
0.145455	17.0539	17.0539
0.166	17.0322	17.0322
0.420833	16.9701	16.9701
0.524444	16.8603	16.8603
0.779167	16.777	16.777
0.762222	16.6788	16.6788
0.244167	16.6752	16.6752
0.0190909	16.6246	16.6246
0.49375	16.5075	16.5075
0.687	16.438	16.438
0.527273	16.3655	16.3655
0.229091	16.2907	16.2907
0.429231	16.2292	16.2292
0.421111	16.2151	16.2151
0.178667	16.0766	16.0766
0.662222	15.9979	15.9979
0.186	15.974	15.974
0.616	15.7726	15.7726
0.535556	15.4877	15.4877
0.399	15.3817	15.3817
0.356667	15.3719	15.3719
0.692727	15.3096	15.3096
0.240833	15.2982	15.2982
0.399167	15.2544	15.2544
0.35	15.1478	15.1478
0.316667	15.0715	15.0715
0.15	15.0362	15.0362
0.421	15.0172	15.0172
0.656667	15.0062	15.0062
0.859167	14.937	14.937
0.644444	14.8008	14.8008
0.402	14.7264	14.7264
0.5475	14.703	14.703
0.255	14.6941	14.6941
0.867778	14.5066	14.5066
0.654667	14.4461	14.4461
0.1125	14.4445	14.4445
0.68	14.3941	14.3941
0.361667	14.1648	14.1648
0.935455	14.1398	14.1398
0.294167	14.1114	14.1114
0.372727	14.0763	14.0763
0.376	13.9781	13.9781
0.461667	13.8691	13.8691
0.773	13.8458	13.8458
0.368571	13.7651	13.7651
0.394167	13.4897	13.4897
0.267273	13.4403	13.4403
0.585	13.415	13.415
0.3675	13.3435	13.3435
0.705	13.279	13.279
0.351111	13.2724	13.2724
0.0973333	13.1971	13.1971
0.7325	13.1017	13.1017
0.180833	12.9272	12.9272
0.5775	12.7913	12.7913
0.478	12.738	12.738
0.346667	12.6709	12.6709
0.255556	12.5764	12.5764
0.463	12.5063	12.5063
0.325556	12.4833	12.4833
0.664444	12.4327	12.4327
0.411667	12.4319	12.4319
0.715	12.1187	12.1187
0.2975	12.0985	12.0985
0.015	11.7229	11.7229
0.958889	11.7122	11.7122
0.8	11.6947	11.6947
0.14	11.5719	11.5719
0.326	11.471	11.471	11.471
0.370833	11.4319	11.4319	11.4319
0.273333	11.2919	11.2919	11.2919
0.430769	11.2888	11.2888	11.2888
0.615455	11.2799	11.2799	11.2799
0.2975	11.2512	11.2512	11.2512
0.226	11.2049	11.2049	11.2049
0.390909	11.2041	11.2041	11.2041
0.395385	11.1558	11.1558	11.1558
0.847333	11.1519	11.1519	11.1519
0.41	11.1386	11.1386	11.1386
0.403	11.131	11.131	11.131
0.348333	11.0674	11.0674	11.0674
0.91	11.0281	11.0281	11.0281
0.517778	11.0137	11.0137	11.0137
0.427778	11.0087	11.0087	11.0087
0.743333	11.0032	11.0032	11.0032
0.333636	10.9719	10.9719	10.9719
0.95625	10.9555	10.9555	10.9555
0.712222	10.8983	10.8983	10.8983
0.3625	10.8729	10.8729	10.8729
0.5375	10.8615	10.8615	10.8615
0.204	10.8397	10.8397	10.8397
0.944545	10.7236	10.7236	10.7236
0.389	10.6583	10.6583	10.6583
0.41	10.6487	10.6487	10.6487
0.319167	10.6211	10.6211	10.6211
0.307273	10.523	10.523	10.523
0.6275	10.5178	10.5178	10.5178
0.908889	10.5053	10.5053	10.5053
0.450833	10.4634	10.4634	10.4634
0.224	10.4544	10.4544	10.4544
0.426923	10.4376	10.4376	10.4376
0.9425	10.4161	10.4161	10.4161
0.182222	10.3887	10.3887	10.3887
0.188889	10.3725	10.3725	10.3725
0.324	10.3499	10.3499	10.3499
0.26	10.3446	10.3446	10.3446
0.426667	10.2995	10.2995	10.2995
0.656667	10.2814	10.2814	10.2814
0.424167	10.2773	10.2773	10.2773
0.193636	10.2433	10.2433	10.2433
0.384545	10.2089	10.2089	10.2089
0.375	10.1462	10.1462	10.1462
0.01125	10.1138	10.1138	10.1138
0.919	10.1022	10.1022	10.1022
0.433	10.087	10.087	10.087
0.228333	10.0633	10.0633	10.0633
0.8775	9.98388	9.98388	9.98388
0.938182	9.89353	9.89353	9.89353
0.1625	9.84137	9.84137	9.84137
0.819333	9.82898	9.82898	9.82898
0.405556	9.78551	9.78551	9.78551
0.53	9.75585	9.75585	9.75585
0.388667	9.70635	9.70635	9.70635
0.926667	9.69851	9.69851	9.69851
0.141111	9.48809	9.48809	9.48809
0.920833	9.42232	9.42232	9.42232
0.195455	9.40947	9.40947	9.40947
0.613	9.38572	9.38572	9.38572
0.346667	9.37642	9.37642	9.37642
0.670667	9.37404	9.37404	9.37404
0.994545	9.33477	9.33477	9.33477
0.773333	9.31589	9.31589	9.31589
0.588182	9.30922	9.30922	9.30922
0.67	9.23769	9.23769	9.23769
0.886667	9.19566	9.19566	9.19566
0.491111	9.12249	9.12249	9.12249
0.365556	9.11229	9.11229	9.11229
0.191	9.11159	9.11159	9.11159
0.260909	9.03975	9.03975	9.03975
0.49	9.01088	9.01088	9.01088
0.920909	8.99619	8.99619	8.99619
0.778333	8.98192	8.98192	8.98192
0.296667	8.98174	8.98174	8.98174
0.525	8.96482	8.96482	8.96482
0.908889	8.95943	8.95943	8.95943
0.396667	8.93776	8.93776	8.93776
0.88	8.91123	8.91123	8.91123
0.715556	8.89764	8.89764	8.89764
0.354167	8.83101	8.83101	8.83101
0.291667	8.8211	8.8211	8.8211
0.53875	8.81666	8.81666	8.81666
0.96	8.80008	8.80008	8.80008
0.5675	8.7632	8.7632	8.7632
0.615	8.72498	8.72498	8.72498
0.223333	8.69404	8.69404	8.69404
0.655	8.60056	8.60056	8.60056
0.43	8.59055	8.59055	8.59055
0.626667	8.51219	8.51219	8.51219
0.4075	8.48236	8.48236	8.48236
0.620833	8.4348	8.4348	8.4348
0.7825	8.38702	8.38702	8.38702
0.91625	8.38637	8.38637	8.38637
0.204167	8.36442	8.36442	8.36442
0.7525	8.36421	8.36421	8.36421
0.155833	8.35783	8.35783	8.35783
0.542	8.32244	8.32244	8.32244
0.718333	8.29454	8.29454	8.29454
0.872727	8.2922	8.2922	8.2922
0.728333	8.28596	8.28596	8.28596
0.942667	8.28281	8.28281	8.28281
0.695	8.28142	8.28142	8.28142
0.8925	8.2637	8.2637	8.2637
0.537778	8.24223	8.24223	8.24223
0.338333	8.22498	8.22498	8.22498
0.044	8.17613	8.17613	8.17613
0.66	8.06857	8.06857	8.06857
0.576667	7.94345	7.94345	7.94345
0.805	7.87128	7.87128	7.87128
0.656667	7.85508	7.85508	7.85508
0.269	7.84523	7.84523	7.84523
0.922	7.83699	7.83699	7.83699
0.765	7.82154	7.82154	7.82154
0.256	7.80609	7.80609	7.80609
0.39	7.80387	7.80387	7.80387
0.733333	7.7763	7.7763	7.7763
0.867778	7.73615	7.73615	7.73615
0.823333	7.67295	7.67295	7.67295
0.507778	7.62118	7.62118	7.62118
0.64125	7.58879	7.58879	7.58879
0.474545	7.49882	7.49882	7.49882
0.736667	7.47394	7.47394	7.47394
0.691	7.42233	7.42233	7.42233
0.355556	7.39925	7.39925	7.39925
0.890667	7.38317	7.38317	7.38317
0.4025	7.3772	7.3772	7.3772
0.68	7.3436	7.3436	7.3436
0.507273	7.32467	7.32467	7.32467
0.217273	7.31481	7.31481	7.31481
0.390667	7.31472	7.31472	7.31472
0.583636	7.31435	7.31435	7.31435
0.35	7.24827	7.24827	7.24827
0.0344444	7.21471	7.21471	7.21471
0.691	7.20501	7.20501	7.20501
0.271667	7.19248	7.19248	7.19248
0.136	7.18638	7.18638	7.18638
0.76125	7.13056	7.13056	7.13056
0.949167	7.1027	7.1027	7.1027
0.709	7.09888	7.09888	7.09888
0.5825	7.08649	7.08649	7.08649
0.688667	7.05528	7.05528	7.05528
0.679	7.0441	7.0441	7.0441
0.236667	7.01517	7.01517	7.01517
0.428182	6.98656	6.98656	6.98656
0.386667	6.93878	6.93878	6.93878
0.875556	6.93602	6.93602	6.93602
0.505556	6.92243	6.92243	6.92243
0.89375	6.91054	6.91054	6.91054
0.58625	6.90692	6.90692	6.90692
0.353333	6.89871	6.89871	6.89871
0.948182	6.85199	6.85199	6.85199
0.558667	6.84555	6.84555	6.84555
0.386364	6.81891	6.81891	6.81891
0.8875	6.81498	6.81498	6.81498
0.40625	6.76876	6.76876	6.76876
0.936667	6.76575	6.76575	6.76575
0.325556	6.73727	6.73727	6.73727
0.635	6.69713	6.69713	6.69713
0.118333	6.69065	6.69065	6.69065
0.739091	6.67879	6.67879	6.67879
0.908	6.67849	6.67849	6.67849
0.408	6.66565	6.66565	6.66565
0.15375	6.60207	6.60207	6.60207
0.579167	6.59549	6.59549	6.59549
0.503333	6.5743	6.5743	6.5743
0.202222	6.55628	6.55628	6.55628
0.6675	6.51293	6.51293	6.51293
0.7025	6.51115	6.51115	6.51115
0.34125	6.49252	6.49252	6.49252
0.804444	6.48048	6.48048	6.48048
0.7625	6.46663	6.46663	6.46663	6.46663
0.274667	6.40542	6.40542	6.40542	6.40542
0.305	6.39694	6.39694	6.39694	6.39694
0.985	6.35602	6.35602	6.35602	6.35602
0.414444	6.26207	6.26207	6.26207	6.26207
0.956667	6.26193	6.26193	6.26193	6.26193
0.151111	6.25973	6.25973	6.25973	6.25973
0.174444	6.25774	6.25774	6.25774	6.25774
0.345	6.25182	6.25182	6.25182	6.25182
0.64	6.22281	6.22281	6.22281	6.22281
0.5375	6.2121	6.2121	6.2121	6.2121
0.605833	6.20763	6.20763	6.20763	6.20763
0.658	6.17188	6.17188	6.17188	6.17188
0.1025	6.15806	6.15806	6.15806	6.15806
0.411	6.15757	6.15757	6.15757	6.15757
0.621333	6.09179	6.09179	6.09179	6.09179
0.940909	6.08842	6.08842	6.08842	6.08842
0.647143	6.03515	6.03515	6.03515	6.03515
0.413333	6.02982	6.02982	6.02982	6.02982
0.9325	5.97958	5.97958	5.97958	5.97958
0.721667	5.95918	5.95918	5.95918	5.95918
0.806667	5.95492	5.95492	5.95492	5.95492
0.31	5.95238	5.95238	5.95238	5.95238
0.244545	5.94206	5.94206	5.94206	5.94206
0.838889	5.91636	5.91636	5.91636	5.91636
0.73375	5.89768	5.89768	5.89768	5.89768
0.851538	5.88904	5.88904	5.88904	5.88904
0.882727	5.85983	5.85983	5.85983	5.85983
0.148333	5.85883	5.85883	5.85883	5.85883
0.6525	5.8279	5.8279	5.8279	5.8279
0.498571	5.80915	5.80915	5.80915	5.80915
0.740909	5.79632	5.79632	5.79632	5.79632
0.7125	5.78467	5.78467	5.78467	5.78467
0.152222	5.78392	5.78392	5.78392	5.78392
0.882222	5.77529	5.77529	5.77529	5.77529
0.711538	5.77484	5.77484	5.77484	5.77484
0.433333	5.73769	5.73769	5.73769	5.73769
0.407	5.72712	5.72712	5.72712	5.72712
0.297778	5.72095	5.72095	5.72095	5.72095
0.467273	5.67375	5.67375	5.67375	5.67375
0.388889	5.66695	5.66695	5.66695	5.66695
0.576667	5.63002	5.63002	5.63002	5.63002
0.595556	5.61179	5.61179	5.61179	5.61179
0.962222	5.60107	5.60107	5.60107	5.60107
0.20625	5.6001	5.6001	5.6001	5.6001
0.577778	5.59916	5.59916	5.59916	5.59916
0.400833	5.57041	5.57041	5.57041	5.57041
0.679167	5.5452	5.5452	5.5452	5.5452
0.91375	5.50744	5.50744	5.50744	5.50744
0.279	5.50472	5.50472	5.50472	5.50472
0.514	5.45945	5.45945	5.45945	5.45945
0.628889	5.40616	5.40616	5.40616	5.40616
0.74125	5.37627	5.37627	5.37627	5.37627
0.3825	5.35616	5.35616	5.35616	5.35616
0.753333	5.32855	5.32855	5.32855	5.32855
0.221818	5.3138	5.3138	5.3138	5.3138
0.619	5.30277	5.30277	5.30277	5.30277
0.635556	5.26875	5.26875	5.26875	5.26875
0.208889	5.23765	5.23765	5.23765	5.23765
0.732727	5.19927	5.19927	5.19927	5.19927
0.518889	5.19254	5.19254	5.19254	5.19254
0.405556	5.16326	5.16326	5.16326	5.16326
0.635	5.16279	5.16279	5.16279	5.16279
0.359167	5.09048	5.09048	5.09048	5.09048
0.595	5.08337	5.08337	5.08337	5.08337
0.821111	5.05891	5.05891	5.05891	5.05891
0.51625	5.04115	5.04115	5.04115	5.04115
0.325556	5.02556	5.02556	5.02556	5.02556
0.4475	4.97299	4.97299	4.97299	4.97299
0.111667	4.92777	4.92777	4.92777	4.92777
0.154545	4.90813	4.90813	4.90813	4.90813
0.871667	4.87024	4.87024	4.87024	4.87024
0.214545	4.85011	4.85011	4.85011	4.85011
0.958333	4.7752	4.7752	4.7752	4.7752
0.17875	4.76515	4.76515	4.76515	4.76515
0.640833	4.75251	4.75251	4.75251	4.75251
0.613	4.75157	4.75157	4.75157	4.75157
0.0922222	4.75028	4.75028	4.75028	4.75028
0.796667	4.69339	4.69339	4.69339	4.69339
0.659091	4.69179	4.69179	4.69179	4.69179
0.514545	4.69074	4.69074	4.69074	4.69074
0.47	4.68873	4.68873	4.68873	4.68873
0.14125	4.6426	4.6426	4.6426	4.6426
0.141	4.63638	4.63638	4.63638	4.63638
0.528571	4.62667	4.62667	4.62667	4.62667
0.955455	4.61428	4.61428	4.61428	4.61428
0.575	4.60769	4.60769	4.60769	4.60769
0.76	4.58677	4.58677	4.58677	4.58677
0.826154	4.55952	4.55952	4.55952	4.55952
0.22	4.51715	4.51715	4.51715	4.51715
0.8375	4.51045	4.51045	4.51045	4.51045
0.540909	4.51023	4.51023	4.51023	4.51023
0.4525	4.50757	4.50757	4.50757	4.50757
0.893333	4.47226	4.47226	4.47226	4.47226
0.347778	4.43139	4.43139	4.43139	4.43139
0.766	4.41225	4.41225	4.41225	4.41225
0.5325	4.41013	4.41013	4.41013	4.41013
0.424167	4.39749	4.39749	4.39749	4.39749
0.985556	4.34798	4.34798	4.34798	4.34798
0.808889	4.347	4.347	4.347	4.347
0.896667	4.34687	4.34687	4.34687	4.34687
0.591667	4.33235	4.33235	4.33235	4.33235
0.940833	4.24423	4.24423	4.24423	4.24423
0.804	4.22908	4.22908	4.22908	4.22908
0.4725	4.22272	4.22272	4.22272	4.22272
0.521111	4.21712	4.21712	4.21712	4.21712
0.826667	4.17555	4.17555	4.17555	4.17555
0.318333	4.11524	4.11524	4.11524	4.11524
0.279	4.10711	4.10711	4.10711	4.10711
0.760909	4.10041	4.10041	4.10041	4.10041
0.5125	4.08826	4.08826	4.08826	4.08826
0.308182	4.07542	4.07542	4.07542	4.07542
0.885	4.07275	4.07275	4.07275	4.07275
0.66	4.06974	4.06974	4.06974	4.06974
0.19	4.06971	4.06971	4.06971	4.06971
0.654167	4.06615	4.06615	4.06615	4.06615
0.220833	3.99827	3.99827	3.99827	3.99827
0.4025	3.95679	3.95679	3.95679	3.95679
0.434545	3.95225	3.95225	3.95225	3.95225
0.443333	3.93498	3.93498	3.93498	3.93498
0.53875	3.92069	3.92069	3.92069	3.92069
0.59875	3.91967	3.91967	3.91967	3.91967
0.27875	3.89545	3.89545	3.89545	3.89545
0.0763636	3.85031	3.85031	3.85031	3.85031
0.515	3.84342	3.84342	3.84342	3.84342
0.720909	3.82681	3.82681	3.82681	3.82681
0.933333	3.82527	3.82527	3.82527	3.82527
0.56875	3.82158	3.82158	3.82158	3.82158
0.902222	3.81263	3.81263	3.81263	3.81263
0.873333	3.79789	3.79789	3.79789	3.79789
0.723333	3.76298	3.76298	3.76298	3.76298
0.686667	3.74167	3.74167	3.74167	3.74167
0.3875	3.73652	3.73652	3.73652	3.73652
0.153636	3.73255	3.73255	3.73255	3.73255
0.712727	3.73065	3.73065	3.73065	3.73065
0.5575	3.72748	3.72748	3.72748	3.72748
0.776	3.72484	3.72484	3.72484	3.72484
0.655833	3.71302	3.71302	3.71302	3.71302
0.508889	3.69664	3.69664	3.69664	3.69664
0.778333	3.68776	3.68776	3.68776	3.68776
0.1525	3.68076	3.68076	3.68076	3.68076
0.23875	3.63292	3.63292	3.63292	3.63292
0.454167	3.62329	3.62329	3.62329	3.62329
0.310833	3.60479	3.60479	3.60479	3.60479
0.113077	3.60274	3.60274	3.60274	3.60274
0.585556	3.57247	3.57247	3.57247	3.57247
0.46	3.56103	3.56103	3.56103	3.56103
0.22	3.55527	3.55527	3.55527	3.55527
0.494444	3.52937	3.52937	3.52937	3.52937
0.29	3.52538	3.52538	3.52538	3.52538
0.6725	3.5126	3.5126	3.5126	3.5126
0.905556	3.50787	3.50787	3.50787	3.50787
0.415833	3.44372	3.44372	3.44372	3.44372
0.805	3.41715	3.41715	3.41715	3.41715
0.880909	3.38642	3.38642	3.38642	3.38642
0.850833	3.38059	3.38059	3.38059	3.38059
0.923636	3.34348	3.34348	3.34348	3.34348
0.772308	3.33543	3.33543	3.33543	3.33543
0.22125	3.32823	3.32823	3.32823	3.32823
0.6525	3.32069	3.32069	3.32069	3.32069
0.133333	3.31682	3.31682	3.31682	3.31682
0.594444	3.29426	3.29426	3.29426	3.29426
0.0355556	3.27593	3.27593	3.27593	3.27593
0.688889	3.2458	3.2458	3.2458	3.2458
0.628333	3.24044	3.24044	3.24044	3.24044
0.1375	3.21947	3.21947	3.21947	3.21947
0.683333	3.21424	3.21424	3.21424	3.21424
0.94	3.18835	3.18835	3.18835	3.18835
0.427778	3.186	3.186	3.186	3.186
0.904444	3.17643	3.17643	3.17643	3.17643
0.397	3.16172	3.16172	3.16172	3.16172
0.741111	3.13995	3.13995	3.13995	3.13995
0.729	3.13214	3.13214	3.13214	3.13214
0.58	3.07067	3.07067	3.07067	3.07067
0.494444	3.06287	3.06287	3.06287	3.06287
0.525	3.05546	3.05546	3.05546	3.05546
0.346667	3.04166	3.04166	3.04166	3.04166
0.83	3.03882	3.03882	3.03882	3.03882
0.307778	3.0007	3.0007	3.0007	3.0007
0.512727	2.97004	2.97004	2.97004	2.97004
0.516667	2.95998	2.95998	2.95998	2.95998
0.474167	2.95228	2.95228	2.95228	2.95228
0.150833	2.94542	2.94542	2.94542	2.94542
0.155	2.93671	2.93671	2.93671	2.93671
0.854444	2.92641	2.92641	2.92641	2.92641
0.698182	2.90362	2.90362	2.90362	2.90362
0.769	2.89314	2.89314	2.89314	2.89314
0.956667	2.84265	2.84265	2.84265	2.84265
0.986667	2.81364	2.81364	2.81364	2.81364
0.615	2.76707	2.76707	2.76707	2.76707
0.70125	2.74338	2.74338	2.74338	2.74338
0.665455	2.70896	2.70896	2.70896	2.70896
0.825	2.69755	2.69755	2.69755	2.69755
0.184545	2.64462	2.64462	2.64462	2.64462
0.148889	2.62647	2.62647	2.62647	2.62647
0.0911111	2.58878	2.58878	2.58878	2.58878
0.856711	2.58135	2.58135	2.58135	2.58135
0.404286	2.57068	2.57068	2.57068	2.57068
0.194167	2.56924	2.56924	2.56924	2.56924
0.2275	2.56598	2.56598	2.56598	2.56598
0.651667	2.54507	2.54507	2.54507	2.54507
0.623333	2.52718	2.52718	2.52718	2.52718
0.641667	2.52512	2.52512	2.52512	2.52512
0.7225	2.49668	2.49668	2.49668	2.49668
0.714545	2.47521	2.47521	2.47521	2.47521
0.46	2.47098	2.47098	2.47098	2.47098
0.413636	2.44561	2.44561	2.44561	2.44561
0.66875	2.43801	2.43801	2.43801	2.43801
0.429091	2.43497	2.43497	2.43497	2.43497
0.923636	2.35121	2.35121	2.35121	2.35121
0.143636	2.34771	2.34771	2.34771	2.34771
0.672727	2.34606	2.34606	2.34606	2.34606
0.8175	2.3457	2.3457	2.3457	2.3457
0.980833	2.33501	2.33501	2.33501	2.33501
0.530833	2.32384	2.32384	2.32384	2.32384
0.43	2.32166	2.32166	2.32166	2.32166
0.4225	2.30142	2.30142	2.30142	2.30142
0.771818	2.19088	2.19088	2.19088	2.19088
0.725556	2.18776	2.18776	2.18776	2.18776
0.36125	2.18206	2.18206	2.18206	2.18206
0.422727	2.17284	2.17284	2.17284	2.17284
0.308333	2.15485	2.15485	2.15485	2.15485
0.973333	2.12261	2.12261	2.12261	2.12261
0.605556	2.11112	2.11112	2.11112	2.11112
0.428182	2.08	2.08	2.08	2.08
0.136364	2.07141	2.07141	2.07141	2.07141
0.717273	2.0671	2.0671	2.0671	2.0671
0.955	2.06375	2.06375	2.06375	2.06375
0.967273	1.99839	1.99839	1.99839	1.99839
0.885	1.99721	1.99721	1.99721	1.99721
0.630833	1.98279	1.98279	1.98279	1.98279
0.353636	1.97748	1.97748	1.97748	1.97748
0.7075	1.95875	1.95875	1.95875	1.95875
0.696667	1.93837	1.93837	1.93837	1.93837
0.425455	1.8902	1.8902	1.8902	1.8902
0.889167	1.88208	1.88208	1.88208	1.88208
0.303333	1.87116	1.87116	1.87116	1.87116
0.718889	1.85738	1.85738	1.85738	1.85738
0.706667	1.84818	1.84818	1.84818	1.84818
0.212727	1.8429	1.8429	1.8429	1.8429
0.992667	1.79095	1.79095	1.79095	1.79095
0.724667	1.77498	1.77498	1.77498	1.77498
0.921111	1.76429	1.76429	1.76429	1.76429
0.43875	1.72624	1.72624	1.72624	1.72624
0.516667	1.72234	1.72234	1.72234	1.72234
0.20875	1.71355	1.71355	1.71355	1.71355
0.508889	1.67519	1.67519	1.67519	1.67519
0.65625	1.67224	1.67224	1.67224	1.67224
0.585556	1.66474	1.66474	1.66474	1.66474
0.39	1.65402	1.65402	1.65402	1.65402
0.308182	1.63874	1.63874	1.63874	1.63874
0.245	1.60108	1.60108	1.60108	1.60108
0.185	1.56855	1.56855	1.56855	1.56855
0.632857	1.55054	1.55054	1.55054	1.55054
0.13	1.50705	1.50705	1.50705	1.50705
0.628182	1.49525	1.49525	1.49525	1.49525
0.203333	1.48892	1.48892	1.48892	1.48892
0.354167	1.43179	1.43179	1.43179	1.43179
0.73875	1.42785	1.42785	1.42785	1.42785
0.0745455	1.41519	1.41519	1.41519	1.41519
0.368571	1.37928	1.37928	1.37928	1.37928
0.137778	1.37531	1.37531	1.37531	1.37531
0.707143	1.36918	1.36918	1.36918	1.36918
0.828	1.34875	1.34875	1.34875	1.34875
0.185	1.34835	1.34835	1.34835	1.34835
0.231429	1.33301	1.33301	1.33301	1.33301
0.404444	1.30738	1.30738	1.30738	1.30738
0.62	1.30435	1.30435	1.30435	1.30435
0.451	1.29954	1.29954	1.29954	1.29954
0.204286	1.29797	1.29797	1.29797	1.29797
0.53125	1.21645	1.21645	1.21645	1.21645
0.259	1.20555	1.20555	1.20555	1.20555
0.801111	1.165	1.165	1.165	1.165
0.393333	1.16333	1.16333	1.16333	1.16333
0.705	1.15725	1.15725	1.15725	1.15725
0.725	1.1562	1.1562	1.1562	1.1562
0.484615	1.14777	1.14777	1.14777	1.14777
0.532	1.14549	1.14549	1.14549	1.14549
0.931429	1.13785	1.13785	1.13785	1.13785
0.773	1.12913	1.12913	1.12913	1.12913
0.958182	1.12174	1.12174	1.12174	1.12174
0.39	1.12135	1.12135	1.12135	1.12135
0.962727	1.1119	1.1119	1.1119	1.1119
0.4725	1.09385	1.09385	1.09385	1.09385
0.51125	1.08561	1.08561	1.08561	1.08561
0.57375	1.0163	1.0163	1.0163	1.0163
0.760909	1.01616	1.01616	1.01616	1.01616
0.4	1.0148	1.0148	1.0148	1.0148
0.10625	1.01378	1.01378	1.01378	1.01378
0.695	0.99474	0.99474	0.99474	0.99474
0.4	0.93359	0.93359	0.93359	0.93359
0.794444	0.93301	0.93301	0.93301	0.93301
0.424	0.9324	0.9324	0.9324	0.9324
0.292308	0.92151	0.92151	0.92151	0.92151
0.205714	0.89351	0.89351	0.89351	0.89351
0.633333	0.89178	0.89178	0.89178	0.89178
0.769091	0.87187	0.87187	0.87187	0.87187
0.848182	0.84877	0.84877	0.84877	0.84877
0.373333	0.81406	0.81406	0.81406	0.81406
0.949091	0.799	0.799	0.799	0.799
0.308333	0.79798	0.79798	0.79798	0.79798
0.69	0.79359	0.79359	0.79359	0.79359
0.426364	0.78039	0.78039	0.78039	0.78039
0.784	0.77604	0.77604	0.77604	0.77604
0.773333	0.77297	0.77297	0.77297	0.77297
0.841111	0.7509	0.7509	0.7509	0.7509
0.37125	0.72819	0.72819	0.72819	0.72819
0.828333	0.70716	0.70716	0.70716	0.70716
0.9225	0.70286	0.70286	0.70286	0.70286
0.756	0.62898	0.62898	0.62898	0.62898
0.392222	0.62795	0.62795	0.62795	0.62795
0.520833	0.56764	0.56764	0.56764	0.56764
0.656667	0.56743	0.56743	0.56743	0.56743
0.649167	0.56448	0.56448	0.56448	0.56448
0.56875	0.54546	0.54546	0.54546	0.54546
0.482	0.50423	0.50423	0.50423	0.50423
0.658	0.48022	0.48022	0.48022	0.48022
0.401111	0.44678	0.44678	0.44678	0.44678
0.919	0.42181	0.42181	0.42181	0.42181
0.0781818	0.42163	0.42163	0.42163	0.42163
0.619091	0.41882	0.41882	0.41882	0.41882
0.692222	0.41785	0.41785	0.41785	0.41785
0.834167	0.41208	0.41208	0.41208	0.41208
0.409	0.36996	0.36996	0.36996	0.36996
0.4475	0.36477	0.36477	0.36477	0.36477
0.568889	0.35051	0.35051	0.35051	0.35051
0.417273	0.31057	0.31057	0.31057	0.31057
0.525556	0.30667	0.30667	0.30667	0.30667
0.35	0.29174	0.29174	0.29174	0.29174
0.51	0.26463	0.26463	0.26463	0.26463
0.344167	0.25983	0.25983	0.25983	0.25983
0.395556	0.23574	0.23574	0.23574	0.23574
0.836	0.23473	0.23473	0.23473	0.23473
0.697143	0.23225	0.23225	0.23225	0.23225
0.395	0.2077	0.2077	0.2077	0.2077
0.705	0.19025	0.19025	0.19025	0.19025
0.452222	0.1778	0.1778	0.1778	0.1778
0.467692	0.1645	0.1645	0.1645	0.1645
0.771429	0.14314	0.14314	0.14314	0.14314
0.06	0.14021	0.14021	0.14021	0.14021
0.853333	0.10998	0.10998	0.10998	0.10998
0.746364	0.03518	0.03518	0.03518	0.03518
0.356667	-0.02231	-0.02231	-0.02231	-0.02231
0.51	-0.05253	-0.05253	-0.05253	-0.05253
0.9725	-0.06077	-0.06077	-0.06077	-0.06077
0.379	-0.0627	-0.0627	-0.0627	-0.0627
0.50625	-0.07025	-0.07025	-0.07025	-0.07025
0.202222	-0.07524	-0.07524	-0.07524	-0.07524
0.419091	-0.07608	-0.07608	-0.07608	-0.07608
0.885833	-0.09502	-0.09502	-0.09502	-0.09502
0.532727	-0.10091	-0.10091	-0.10091	-0.10091
0.862857	-0.14827	-0.14827	-0.14827	-0.14827
0.46	-0.18629	-0.18629	-0.18629	-0.18629
0.946364	-0.18859	-0.18859	-0.18859	-0.18859
0.973	-0.2227	-0.2227	-0.2227	-0.2227
0.678182	-0.24117	-0.24117	-0.24117	-0.24117
0.901667	-0.28648	-0.28648	-0.28648	-0.28648
0.7725	-0.36325	-0.36325	-0.36325	-0.36325
0.243636	-0.36336	-0.36336	-0.36336	-0.36336
0.828571	-0.40723	-0.40723	-0.40723	-0.40723
0.743333	-0.41272	-0.41272	-0.41272	-0.41272
0.759167	-0.44716	-0.44716	-0.44716	-0.44716
0.592	-0.45817	-0.45817	-0.45817	-0.45817
0.547778	-0.48776	-0.48776	-0.48776	-0.48776
0.413636	-0.50475	-0.50475	-0.50475	-0.50475
0.822	-0.51825	-0.51825	-0.51825	-0.51825
0.775556	-0.55326	-0.55326	-0.55326	-0.55326
0.826	-0.55484	-0.55484	-0.55484	-0.55484
0.685	-0.57196	-0.57196	-0.57196	-0.57196
0.568889	-0.58073	-0.58073	-0.58073	-0.58073
0.581429	-0.5904	-0.5904	-0.5904	-0.5904
0.992667	-0.60168	-0.60168	-0.60168	-0.60168
0.272222	-0.60758	-0.60758	-0.60758	-0.60758
0.744286	-0.61394	-0.61394	-0.61394	-0.61394
0.351818	-0.62961	-0.62961	-0.62961	-0.62961
0.824167	-0.6433	-0.6433	-0.6433	-0.6433
0.358667	-0.65615	-0.65615	-0.65615	-0.65615
0.554444	-0.67347	-0.67347	-0.67347	-0.67347
0.76	-0.69284	-0.69284	-0.69284	-0.69284
0.702222	-0.69538	-0.69538	-0.69538	-0.69538
0.58	-0.72369	-0.72369	-0.72369	-0.72369
0.393333	-0.73361	-0.73361	-0.73361	-0.73361
0.772222	-0.73409	-0.73409	-0.73409	-0.73409
0.368889	-0.75986	-0.75986	-0.75986	-0.75986
0.887273	-0.79396	-0.79396	-0.79396	-0.79396
0.850833	-0.8259	-0.8259	-0.8259	-0.8259
0.426667	-0.82885	-0.82885	-0.82885	-0.82885
0.645	-0.85476	-0.85476	-0.85476	-0.85476
0.9225	-0.8554	-0.8554	-0.8554	-0.8554
0.4025	-0.85726	-0.85726	-0.85726	-0.85726
0.536667	-0.86096	-0.86096	-0.86096	-0.86096
0.970833	-0.8734	-0.8734	-0.8734	-0.8734
0.374167	-0.88073	-0.88073	-0.88073	-0.88073
0.750909	-0.90778	-0.90778	-0.90778	-0.90778
0.942727	-0.91747	-0.91747	-0.91747	-0.91747
0.54	-0.93323	-0.93323	-0.93323	-0.93323
0.61	-0.94988	-0.94988	-0.94988	-0.94988
0.46375	-0.95361	-0.95361	-0.95361	-0.95361
0.401	-0.99609	-0.99609	-0.99609	-0.99609
0.366667	-1.00131	-1.00131	-1.00131	-1.00131
0.402308	-1.01194	-1.01194	-1.01194	-1.01194
0.69375	-1.05396	-1.05396	-1.05396	-1.05396
0.576667	-1.10321	-1.10321	-1.10321	-1.10321
0.648333	-1.11578	-1.11578	-1.11578	-1.11578
0.668182	-1.12142	-1.12142	-1.12142	-1.12142
0.748182	-1.13078	-1.13078	-1.13078	-1.13078
0.813333	-1.14701	-1.14701	-1.14701	-1.14701
0.87	-1.18488	-1.18488	-1.18488	-1.18488
0.6	-1.19775	-1.19775	-1.19775	-1.19775
0.83	-1.22493	-1.22493	-1.22493	-1.22493
0.656667	-1.2292	-1.2292	-1.2292	-1.2292
0.531429	-1.23671	-1.23671	-1.23671	-1.23671
0.84	-1.27271	-1.27271	-1.27271	-1.27271
0.461667	-1.28965	-1.28965	-1.28965	-1.28965
0.743333	-1.30387	-1.30387	-1.30387	-1.30387
0.9075	-1.30732	-1.30732	-1.30732	-1.30732
0.404	-1.32083	-1.32083	-1.32083	-1.32083
0.794545	-1.38544	-1.38544	-1.38544	-1.38544
0.4225	-1.3879	-1.3879	-1.3879	-1.3879
0.646364	-1.39009	-1.39009	-1.39009	-1.39009
0.84	-1.42707	-1.42707	-1.42707	-1.42707
0.54	-1.43086	-1.43086	-1.43086	-1.43086
0.39875	-1.43691	-1.43691	-1.43691	-1.43691
0.605	-1.43854	-1.43854	-1.43854	-1.43854
0.841429	-1.44273	-1.44273	-1.44273	-1.44273
0.742	-1.44364	-1.44364	-1.44364	-1.44364
0.704	-1.49087	-1.49087	-1.49087	-1.49087
0.271818	-1.49827	-1.49827	-1.49827	-1.49827
0.831429	-1.50347	-1.50347	-1.50347	-1.50347
0.753333	-1.55784	-1.55784	-1.55784	-1.55784
0.393333	-1.59742	-1.59742	-1.59742	-1.59742
0.877273	-1.60493	-1.60493	-1.60493	-1.60493
0.609	-1.615	-1.615	-1.615	-1.615
0.294444	-1.64706	-1.64706	-1.64706	-1.64706
0.687333	-1.66303	-1.66303	-1.66303	-1.66303
0.385455	-1.67434	-1.67434	-1.67434	-1.67434
0.43	-1.6832	-1.6832	-1.6832	-1.6832
0.371333	-1.68791	-1.68791	-1.68791	-1.68791
0.532222	-1.71138	-1.71138	-1.71138	-1.71138
0.595	-1.71209	-1.71209	-1.71209	-1.71209
0.745455	-1.7319	-1.7319	-1.7319	-1.7319
0.826667	-1.73517	-1.73517	-1.73517	-1.73517
0.646667	-1.76963	-1.76963	-1.76963	-1.76963
0.733333	-1.78934	-1.78934	-1.78934	-1.78934
0.35	-1.7894	-1.7894	-1.7894	-1.7894
0.111538	-1.79208	-1.79208	-1.79208	-1.79208
0.572222	-1.82068	-1.82068	-1.82068	-1.82068
0.988182	-1.82594	-1.82594	-1.82594	-1.82594
0.292667	-1.85246	-1.85246	-1.85246	-1.85246
0.385455	-1.85334	-1.85334	-1.85334	-1.85334
0.645	-1.86033	-1.86033	-1.86033	-1.86033
0.441111	-1.86445	-1.86445	-1.86445	-1.86445
0.766364	-1.91917	-1.91917	-1.91917	-1.91917
0.488	-1.92665	-1.92665	-1.92665	-1.92665
0.942308	-2.01568	-2.01568	-2.01568	-2.01568
0.705556	-2.04973	-2.04973	-2.04973	-2.04973
0.783333	-2.0733	-2.0733	-2.0733	-2.0733
0.351111	-2.07676	-2.07676	-2.07676	-2.07676
0.655833	-2.08433	-2.08433	-2.08433	-2.08433
0.981667	-2.13112	-2.13112	-2.13112	-2.13112
0.78	-2.13987	-2.13987	-2.13987	-2.13987
0.763846	-2.14957	-2.14957	-2.14957	-2.14957
0.461111	-2.16074	-2.16074	-2.16074	-2.16074
0.43	-2.16308	-2.16308	-2.16308	-2.16308
0.64875	-2.17319	-2.17319	-2.17319	-2.17319
0.616	-2.19869	-2.19869	-2.19869	-2.19869
0.65625	-2.20579	-2.20579	-2.20579	-2.20579
0.914	-2.2213	-2.2213	-2.2213	-2.2213
0.603333	-2.23568	-2.23568	-2.23568	-2.23568
0.67	-2.26281	-2.26281	-2.26281	-2.26281
0.501818	-2.26509	-2.26509	-2.26509	-2.26509
0.519231	-2.28038	-2.28038	-2.28038	-2.28038
0.83	-2.28365	-2.28365	-2.28365	-2.28365
0.404286	-2.29178	-2.29178	-2.29178	-2.29178
0.63	-2.3063	-2.3063	-2.3063	-2.3063
0.876667	-2.3288	-2.3288	-2.3288	-2.3288
0.560909	-2.34532	-2.34532	-2.34532	-2.34532
0.4925	-2.35766	-2.35766	-2.35766	-2.35766
0.765333	-2.36073	-2.36073	-2.36073	-2.36073
0.560909	-2.37225	-2.37225	-2.37225	-2.37225
0.8225	-2.39835	-2.39835	-2.39835	-2.39835
0.453	-2.43955	-2.43955	-2.43955	-2.43955
0.281111	-2.44733	-2.44733	-2.44733	-2.44733
0.557143	-2.50058	-2.50058	-2.50058	-2.50058
0.525556	-2.50126	-2.50126	-2.50126	-2.50126
0.581111	-2.50329	-2.50329	-2.50329	-2.50329
0.105	-2.50785	-2.50785	-2.50785	-2.50785
0.716	-2.51696	-2.51696	-2.51696	-2.51696
0.83375	-2.54331	-2.54331	-2.54331	-2.54331
0.404444	-2.54538	-2.54538	-2.54538	-2.54538
0.645556	-2.57136	-2.57136	-2.57136	-2.57136
0.504545	-2.57326	-2.57326	-2.57326	-2.57326
0.518	-2.57962	-2.57962	-2.57962	-2.57962
0.705833	-2.58499	-2.58499	-2.58499	-2.58499
0.93	-2.58709	-2.58709	-2.58709	-2.58709
0.813333	-2.59234	-2.59234	-2.59234	-2.59234
0.920909	-2.60982	-2.60982	-2.60982	-2.60982
0.4775	-2.62987	-2.62987	-2.62987	-2.62987
0.143333	-2.64736	-2.64736	-2.64736	-2.64736
0.30875	-2.65559	-2.65559	-2.65559	-2.65559
0.4	-2.65614	-2.65614	-2.65614	-2.65614
0.930833	-2.6822	-2.6822	-2.6822	-2.6822
0.735	-2.68678	-2.68678	-2.68678	-2.68678
0.232727	-2.6906	-2.6906	-2.6906	-2.6906
0.505556	-2.69312	-2.69312	-2.69312	-2.69312
0.238333	-2.75579	-2.75579	-2.75579	-2.75579
0.724	-2.75746	-2.75746	-2.75746	-2.75746
0.674545	-2.76519	-2.76519	-2.76519	-2.76519
0.54	-2.81968	-2.81968	-2.81968	-2.81968
0.104167	-2.82031	-2.82031	-2.82031	-2.82031
0.805	-2.83028	-2.83028	-2.83028	-2.83028
0.291667	-2.84144	-2.84144	-2.84144	-2.84144
0.648889	-2.85704	-2.85704	-2.85704	-2.85704
0.69	-2.91334	-2.91334	-2.91334	-2.91334
0.162308	-3.00888	-3.00888	-3.00888	-3.00888
0.4375	-3.04618	-3.04618	-3.04618	-3.04618
0.66	-3.05536	-3.05536	-3.05536	-3.05536
0.92625	-3.08124	-3.08124	-3.08124	-3.08124
0.718	-3.11672	-3.11672	-3.11672	-3.11672
0.136667	-3.19235	-3.19235	-3.19235	-3.19235
0.462667	-3.19868	-3.19868	-3.19868	-3.19868
0.551111	-3.22526	-3.22526	-3.22526	-3.22526
0.15	-3.23131	-3.23131	-3.23131	-3.23131
0.775833	-3.23879	-3.23879	-3.23879	-3.23879
0.625455	-3.25629	-3.25629	-3.25629	-3.25629
0.286667	-3.25917	-3.25917	-3.25917	-3.25917
0.738889	-3.25961	-3.25961	-3.25961	-3.25961
0.609091	-3.26634	-3.26634	-3.26634	-3.26634
0.721667	-3.28156	-3.28156	-3.28156	-3.28156
0.929167	-3.31737	-3.31737	-3.31737	-3.31737
0.690667	-3.34564	-3.34564	-3.34564	-3.34564
0.3075	-3.34634	-3.34634	-3.34634	-3.34634
0.281111	-3.34906	-3.34906	-3.34906	-3.34906
0.687778	-3.35215	-3.35215	-3.35215	-3.35215
0.766	-3.3895	-3.3895	-3.3895	-3.3895
0.500909	-3.43023	-3.43023	-3.43023	-3.43023
0.4525	-3.43993	-3.43993	-3.43993	-3.43993
0.448889	-3.45306	-3.45306	-3.45306	-3.45306
0.45875	-3.45574	-3.45574	-3.45574	-3.45574
0.483333	-3.50108	-3.50108	-3.50108	-3.50108
0.597778	-3.55037	-3.55037	-3.55037	-3.55037
0.27625	-3.55676	-3.55676	-3.55676	-3.55676
0.64	-3.58449	-3.58449	-3.58449	-3.58449
0.387273	-3.59254	-3.59254	-3.59254	-3.59254
0.235	-3.59921	-3.59921	-3.59921	-3.59921
0.976667	-3.60624	-3.60624	-3.60624	-3.60624
0.52125	-3.61507	-3.61507	-3.61507	-3.61507
0.633333	-3.65482	-3.65482	-3.65482	-3.65482
0.941111	-3.6703	-3.6703	-3.6703	-3.6703
0.0675	-3.69881	-3.69881	-3.69881	-3.69881
0.309091	-3.71868	-3.71868	-3.71868	-3.71868
0.707	-3.79281	-3.79281	-3.79281	-3.79281
0.4675	-3.81178	-3.81178	-3.81178	-3.81178
0.496667	-3.8351	-3.8351	-3.8351	-3.8351
0.483	-3.88549	-3.88549	-3.88549	-3.88549
0.605	-3.88576	-3.88576	-3.88576	-3.88576
0.718333	-3.9014	-3.9014	-3.9014	-3.9014
0.375333	-3.92815	-3.92815	-3.92815	-3.92815
0.524444	-3.93643	-3.93643	-3.93643	-3.93643
0.66	-3.95712	-3.95712	-3.95712	-3.95712
0.879	-3.98304	-3.98304	-3.98304	-3.98304
0.528889	-4.00518	-4.00518	-4.00518	-4.00518
0.405556	-4.04624	-4.04624	-4.04624	-4.04624
0.638889	-4.0719	-4.0719	-4.0719	-4.0719
0.650833	-4.11816	-4.11816	-4.11816	-4.11816
0.583333	-4.12123	-4.12123	-4.12123	-4.12123
0.596667	-4.13004	-4.13004	-4.13004	-4.13004
0.834545	-4.1423	-4.1423	-4.1423	-4.1423
0.789	-4.1452	-4.1452	-4.1452	-4.1452
0.927	-4.15976	-4.15976	-4.15976	-4.15976
0.247	-4.16554	-4.16554	-4.16554	-4.16554
0.897778	-4.18328	-4.18328	-4.18328	-4.18328
0.453333	-4.18741	-4.18741	-4.18741	-4.18741
0.567333	-4.19321	-4.19321	-4.19321	-4.19321
0.6575	-4.20018	-4.20018	-4.20018	-4.20018
0.422727	-4.21295	-4.21295	-4.21295	-4.21295
0.140667	-4.24415	-4.24415	-4.24415	-4.24415
0.513636	-4.25878	-4.25878	-4.25878	-4.25878
0.72	-4.28389	-4.28389	-4.28389	-4.28389
0.976667	-4.28397	-4.28397	-4.28397	-4.28397
0.606667	-4.30258	-4.30258	-4.30258	-4.30258
0.318333	-4.3393	-4.3393	-4.3393	-4.3393
0.2225	-4.37739	-4.37739	-4.37739	-4.37739
0.53	-4.45268	-4.45268	-4.45268	-4.45268
0.3825	-4.48483	-4.48483	-4.48483	-4.48483
0.664167	-4.49779	-4.49779	-4.49779	-4.49779
0.218333	-4.51446	-4.51446	-4.51446	-4.51446
0.476667	-4.55806	-4.55806	-4.55806	-4.55806
0.741111	-4.6202	-4.6202	-4.6202	-4.6202
0.62	-4.6231	-4.6231	-4.6231	-4.6231
0.952	-4.66686	-4.66686	-4.66686	-4.66686
0.6	-4.75947	-4.75947	-4.75947	-4.75947
0.635556	-4.77795	-4.77795	-4.77795	-4.77795
0.546667	-4.78002	-4.78002	-4.78002	-4.78002
0.658	-4.82034	-4.82034	-4.82034	-4.82034
0.128333	-4.82701	-4.82701	-4.82701	-4.82701
0.4325	-4.92186	-4.92186	-4.92186	-4.92186
0.537	-4.94535	-4.94535	-4.94535	-4.94535
0.694	-5.00429	-5.00429	-5.00429	-5.00429
0.820833	-5.03422	-5.03422	-5.03422	-5.03422
0.609167	-5.07166	-5.07166	-5.07166	-5.07166
0.672727	-5.23669	-5.23669	-5.23669	-5.23669
0.677	-5.24592	-5.24592	-5.24592	-5.24592
0.0744444	-5.25673	-5.25673	-5.25673	-5.25673
0.58	-5.26316	-5.26316	-5.26316	-5.26316
0.541818	-5.29505	-5.29505	-5.29505	-5.29505
0.0754545	-5.31444	-5.31444	-5.31444	-5.31444
0.202222	-5.32568	-5.32568	-5.32568	-5.32568
0.894545	-5.33966	-5.33966	-5.33966	-5.33966
0.656667	-5.34455	-5.34455	-5.34455	-5.34455
0.835556	-5.35374	-5.35374	-5.35374	-5.35374
0.836364	-5.35772	-5.35772	-5.35772	-5.35772
0.943333	-5.36387	-5.36387	-5.36387	-5.36387
0.63	-5.41492	-5.41492	-5.41492	-5.41492
0.752	-5.42523	-5.42523	-5.42523	-5.42523
0.800833	-5.49676	-5.49676	-5.49676	-5.49676
0.275556	-5.54337	-5.54337	-5.54337	-5.54337
0.476667	-5.55137	-5.55137	-5.55137	-5.55137
0.65125	-5.6021	-5.6021	-5.6021	-5.6021
0.754444	-5.63523	-5.63523	-5.63523	-5.63523
0.415	-5.63831	-5.63831	-5.63831	-5.63831
0.573333	-5.6467	-5.6467	-5.6467	-5.6467
0.589091	-5.65523	-5.65523	-5.65523	-5.65523
0.462222	-5.74275	-5.74275	-5.74275	-5.74275
0.73	-5.80303	-5.80303	-5.80303	-5.80303
0.498889	-5.80622	-5.80622	-5.80622	-5.80622
0.476667	-5.84558	-5.84558	-5.84558	-5.84558
0.2775	-5.87333	-5.87333	-5.87333	-5.87333
0.441429	-5.89313	-5.89313	-5.89313	-5.89313
0.331111	-5.89718	-5.89718	-5.89718	-5.89718
0.688667	-5.93544	-5.93544	-5.93544	-5.93544
0.704444	-5.97235	-5.97235	-5.97235	-5.97235
0.463333	-5.98908	-5.98908	-5.98908	-5.98908
0.358889	-6.02761	-6.02761	-6.02761	-6.02761
0.924167	-6.02901	-6.02901	-6.02901	-6.02901
0.125556	-6.05115	-6.05115	-6.05115	-6.05115
0.626667	-6.07363	-6.07363	-6.07363	-6.07363
0.113333	-6.08401	-6.08401	-6.08401	-6.08401
0.241333	-6.09055	-6.09055	-6.09055	-6.09055
0.298182	-6.10025	-6.10025	-6.10025	-6.10025
0.0633333	-6.13921	-6.13921	-6.13921	-6.13921
0.772222	-6.14591	-6.14591	-6.14591	-6.14591
0.17	-6.18357	-6.18357	-6.18357	-6.18357
0.868333	-6.22737	-6.22737	-6.22737	-6.22737
0.90625	-6.23191	-6.23191	-6.23191	-6.23191
0.421	-6.23913	-6.23913	-6.23913	-6.23913
0.751111	-6.23997	-6.23997	-6.23997	-6.23997
0.427778	-6.24246	-6.24246	-6.24246	-6.24246
0.647778	-6.26601	-6.26601	-6.26601
0.806667	-6.27709	-6.27709	-6.27709
0.771	-6.2859	-6.2859	-6.2859
0.4675	-6.33859	-6.33859	-6.33859
0.935	-6.34327	-6.34327	-6.34327
0.4875	-6.39065	-6.39065	-6.39065
0.974667	-6.43254	-6.43254	-6.43254
0.576667	-6.47012	-6.47012	-6.47012
0.87875	-6.47278	-6.47278	-6.47278
0.159167	-6.48652	-6.48652	-6.48652
0.281667	-6.48928	-6.48928	-6.48928
0.0427273	-6.5267	-6.5267	-6.5267
0.343333	-6.52896	-6.52896	-6.52896
0.974545	-6.54328	-6.54328	-6.54328
0.552	-6.56804	-6.56804	-6.56804
0.58625	-6.57651	-6.57651	-6.57651
0.6	-6.60709	-6.60709	-6.60709
0.693333	-6.63371	-6.63371	-6.63371
0.33	-6.65696	-6.65696	-6.65696
0.44	-6.65928	-6.65928	-6.65928
0.4925	-6.71059	-6.71059	-6.71059
0.594444	-6.72385	-6.72385	-6.72385
0.3	-6.72908	-6.72908	-6.72908
0.668462	-6.76579	-6.76579	-6.76579
0.5975	-6.7738	-6.7738	-6.7738
0.323333	-6.77599	-6.77599	-6.77599
0.55	-6.78251	-6.78251	-6.78251
0.769	-6.78491	-6.78491	-6.78491
0.175	-6.79379	-6.79379	-6.79379
0.527778	-6.79572	-6.79572	-6.79572
0.454444	-6.79775	-6.79775	-6.79775
0.407143	-6.82869	-6.82869	-6.82869
0.26	-6.85759	-6.85759	-6.85759
0.4025	-6.89142	-6.89142	-6.89142
0.416667	-6.93609	-6.93609	-6.93609
0.801667	-7.00481	-7.00481	-7.00481
0.744444	-7.00769	-7.00769	-7.00769
0.516667	-7.01642	-7.01642	-7.01642
0.836667	-7.03656	-7.03656	-7.03656
0.644444	-7.06309	-7.06309	-7.06309
0.3025	-7.06685	-7.06685	-7.06685
0.9375	-7.09431	-7.09431	-7.09431
0.580833	-7.09663	-7.09663	-7.09663
0.85	-7.10149	-7.10149	-7.10149
0.654167	-7.16518	-7.16518	-7.16518
0.39875	-7.19901	-7.19901	-7.19901
0.14	-7.24167	-7.24167	-7.24167
0.369167	-7.24732	-7.24732	-7.24732
0.753636	-7.25056	-7.25056	-7.25056
0.504545	-7.46883	-7.46883	-7.46883
0.726667	-7.48336	-7.48336	-7.48336
0.837273	-7.53506	-7.53506	-7.53506
0.640909	-7.5697	-7.5697	-7.5697
0.65	-7.59347	-7.59347	-7.59347
0.830667	-7.60049	-7.60049	-7.60049
0.508182	-7.62207	-7.62207	-7.62207
0.64	-7.64555	-7.64555	-7.64555
0.425	-7.68682	-7.68682	-7.68682
0.487	-7.79668	-7.79668	-7.79668
0.564	-7.81874	-7.81874	-7.81874
0.131111	-7.86332	-7.86332	-7.86332
0.638333	-7.90873	-7.90873	-7.90873
0.427778	-7.95108	-7.95108	-7.95108
0.654444	-7.99644	-7.99644	-7.99644
0.857778	-8.02635	-8.02635	-8.02635
0.706364	-8.03498	-8.03498	-8.03498
0.0433333	-8.1098	-8.1098	-8.1098
0.356667	-8.15066	-8.15066	-8.15066
0.632	-8.17092	-8.17092	-8.17092
0.562	-8.19539	-8.19539	-8.19539
0.5075	-8.20926	-8.20926	-8.20926
0.615	-8.22304	-8.22304	-8.22304
0.64625	-8.25064	-8.25064	-8.25064
0.328667	-8.31505	-8.31505	-8.31505
0.515833	-8.31774	-8.31774	-8.31774
0.671538	-8.35072	-8.35072	-8.35072
0.367	-8.35296	-8.35296	-8.35296
0.53125	-8.36535	-8.36535	-8.36535
0.158182	-8.54484	-8.54484	-8.54484
0.535	-8.64554	-8.64554	-8.64554
0.468182	-8.68986	-8.68986	-8.68986
0.5475	-8.69744	-8.69744	-8.69744
0.631667	-8.8008	-8.8008	-8.8008
0.531	-8.80816	-8.80816	-8.80816
0.486364	-8.86274	-8.86274	-8.86274
0.322857	-8.91024	-8.91024	-8.91024
0.4525	-9.11464	-9.11464	-9.11464
0.75	-9.15262	-9.15262	-9.15262
0.988889	-9.20029	-9.20029	-9.20029
0.563	-9.21045	-9.21045	-9.21045
0.580909	-9.46052	-9.46052	-9.46052
0.354167	-9.46146	-9.46146	-9.46146
0.321429	-9.47053	-9.47053	-9.47053
0.35	-9.53959	-9.53959	-9.53959
0.212222	-9.56083	-9.56083	-9.56083
0.40125	-9.5704	-9.5704	-9.5704
0.74	-9.58225	-9.58225	-9.58225
0.622222	-9.58353	-9.58353	-9.58353
0.514444	-9.73308	-9.73308	-9.73308
0.807778	-9.82761	-9.82761	-9.82761
0.698	-9.85701	-9.85701	-9.85701
0.565	-9.92341	-9.92341	-9.92341
0.8175	-10.0069	-10.0069	-10.0069
0.545556	-10.035	-10.035	-10.035
0.410667	-10.1353	-10.1353	-10.1353
0.47	-10.1537	-10.1537	-10.1537
0.619231	-10.2142	-10.2142	-10.2142
0.383636	-10.2175	-10.2175	-10.2175
0.545	-10.2651	-10.2651	-10.2651
0.811111	-10.3899	-10.3899	-10.3899
0.314	-10.4114	-10.4114	-10.4114
0.741111	-10.4772	-10.4772	-10.4772
0.64	-10.5572	-10.5572	-10.5572
0.625	-10.6205	-10.6205	-10.6205
0.495385	-10.6308	-10.6308	-10.6308
0.411111	-10.6917	-10.6917	-10.6917
0.574	-10.6935	-10.6935	-10.6935
0.908333	-10.6997	-10.6997	-10.6997
0.545833	-10.7273	-10.7273	-10.7273
0.553333	-10.7453	-10.7453	-10.7453
0.084	-10.761	-10.761	-10.761
0.483333	-10.8276	-10.8276	-10.8276
0.504444	-10.8666	-10.8666	-10.8666
0.307778	-10.8756	-10.8756	-10.8756
0.120833	-10.9504	-10.9504	-10.9504
0.923333	-10.9803	-10.9803	-10.9803
0.643636	-11.0692	-11.0692	-11.0692
0.278	-11.0953	-11.0953	-11.0953
0.435	-11.1176	-11.1176	-11.1176
0.813	-11.1186	-11.1186	-11.1186
0.67	-11.2579	-11.2579	-11.2579
0.451667	-11.2692	-11.2692	-11.2692
0.661667	-11.2878	-11.2878	-11.2878
0.804167	-11.3553	-11.3553	-11.3553
0.628	-11.3648	-11.3648	-11.3648
0.0808333	-11.3826	-11.3826	-11.3826
0.814	-11.4057	-11.4057	-11.4057
0.529	-11.467	-11.467	-11.467
0.206364	-11.7383	-11.7383	-11.7383
0.4	-11.8199	-11.8199	-11.8199
0.398	-11.9045	-11.9045	-11.9045
0.366667	-11.9196	-11.9196	-11.9196
0.844	-11.9412	-11.9412	-11.9412
0.527778	-11.9532	-11.9532	-11.9532
0.754667	-12.0495	-12.0495	-12.0495
0.1825	-12.1136	-12.1136	-12.1136
0.39	-12.1372	-12.1372	-12.1372
0.580769	-12.2569	-12.2569	-12.2569
0.651111	-12.32	-12.32	-12.32
0.368333	-12.4551	-12.4551	-12.4551
0.638	-12.4823	-12.4823	-12.4823
0.20875	-12.5811	-12.5811	-12.5811
0.645556	-12.5989	-12.5989	-12.5989
0.433333	-12.7188	-12.7188
0.5425	-12.8762	-12.8762
0.227273	-12.8913	-12.8913
0.733333	-12.9562	-12.9562
0.211667	-12.989	-12.989
0.175833	-12.9995	-12.9995
0.3825	-13.0102	-13.0102
0.82	-13.0362	-13.0362
0.973333	-13.2112	-13.2112
0.131	-13.2372	-13.2372
0.0393333	-13.4926	-13.4926
0.597778	-13.5253	-13.5253
0.848	-13.5283	-13.5283
0.805833	-13.543	-13.543
0.547778	-13.5631	-13.5631
0.325833	-13.7337	-13.7337
0.506667	-13.7389	-13.7389
0.6575	-13.7507	-13.7507
0.4	-13.771	-13.771
0.05875	-13.9035	-13.9035
0.86	-14.0945	-14.0945
0.526667	-14.1752	-14.1752
0.857778	-14.2115	-14.2115
0.265	-14.2863	-14.2863
0.890909	-14.406	-14.406
0.259333	-14.4068	-14.4068
0.216667	-14.421	-14.421
0.695556	-14.4824	-14.4824
0.79375	-14.5988	-14.5988
0.0408333	-14.8462	-14.8462
0.9625	-14.8925	-14.8925
0.348889	-14.9254	-14.9254
0.4375	-14.9256	-14.9256
0.410833	-14.9417	-14.9417
0.405	-15.0374	-15.0374
0.65	-15.1172	-15.1172
0.508182	-15.1453	-15.1453
0.63	-15.1694	-15.1694
0.2625	-15.3958	-15.3958
0.373	-15.7309	-15.7309
0.646	-15.7615	-15.7615
0.07375	-15.7768	-15.7768
0.485	-15.8061	-15.8061
0.643	-15.8906	-15.8906
0.369	-15.9418	-15.9418
0.476667	-15.9788	-15.9788
0.313	-15.9845	-15.9845
0.144667	-16.0492	-16.0492
0.446364	-16.1196	-16.1196
0.65875	-16.1818	-16.1818
0.487692	-16.2231	-16.2231
0.161111	-16.28	-16.28
0.613333	-16.4021	-16.4021
0.670833	-16.4303	-16.4303
0.485	-16.7553	-16.7553
0.465	-17.1201	-17.1201
0.684	-17.1574	-17.1574
0.6975	-17.1603	-17.1603
0.37	-17.1908	-17.1908
0.785	-17.1972	-17.1972
0.23875	-17.2515	-17.2515
0.694	-17.3912	-17.3912
0.161	-17.4308	-17.4308
0.454167	-17.4934	-17.4934
0.385	-17.7575	-17.7575
0.423333	-17.9764	-17.9764
0.947778	-18.1102	-18.1102
0.221	-18.3118	-18.3118
0.359167	-18.4037	-18.4037
0.871	-18.6488	-18.6488
0.291111	-18.6786	-18.6786
0.139167	-18.6823	-18.6823
0.465	-18.8432	-18.8432
0.728889	-18.8517	-18.8517
0.236364	-18.8543	-18.8543
0.514286	-18.9199	-18.9199
0.5925	-18.9317	-18.9317
0.556667	-18.95	-18.95
0.482	-19.11	-19.11
0.445455	-19.3626	-19.3626
0.358	-19.3812	-19.3812
0.057	-19.5515	-19.5515
0.5925	-19.5664	-19.5664
0.645455	-19.6034	-19.6034
0.447273	-19.7031	-19.7031
0.224	-19.7069	-19.7069
0.607778	-19.737	-19.737
0.53	-19.8769	-19.8769
0.722	-19.9033	-19.9033
0.0618182	-19.9613	-19.9613
0.199091	-20.0186	-20.0186
0.294167	-20.1177	-20.1177
0.534615	-20.1784	-20.1784
0.79	-20.3613	-20.3613
0.24	-20.5416	-20.5416
0.395	-20.5927	-20.5927
0.563	-20.8724	-20.8724
0.413333	-21.1399	-21.1399
0.19625	-21.4169	-21.4169
0.745	-21.4725	-21.4725
0.872727	-21.6673	-21.6673
0.445455	-21.7992	-21.7992
0.33	-22.1732	-22.1732
0.239	-22.4408	-22.4408
0.615	-22.5183	-22.5183
0.828	-22.8554	-22.8554
0.468	-22.9866	-22.9866
0.76	-23.6648	-23.6648
0.293333	-23.6925	-23.6925
0.421667	-23.8289	-23.8289
0.364444	-23.8315	-23.8315
0.874	-24.0671	-24.0671
0.025	-24.2679	-24.2679
0.290667	-24.5533	-24.5533
0.197778	-24.7926	-24.7926
0.52	-24.8361	-24.8361
0.560909	-24.9589	-24.9589
0.12125	-25.5202	-25.5202
0.0988889	-26.0257	-26.0257
0.401667	-26.3427	-26.3427
0.4675	-26.3504	-26.3504
0.691111	-26.6996	-26.6996
0.334	-26.8996
0.406667	-26.9871
0.0541667	-28.1083
0.417333	-28.7734
0.188	-28.9959
0.1825	-29.0922
0.584615	-29.3626
0.546667	-29.7197
0.227333	-29.7561
0.422727	-30.1417
0.22	-30.1783
0.329	-32.9283
0.184	-33.7693
0.305	-33.9721
0.415833	-34.7084
0.30625	-35.0058
0.596	-36.6922
0.293333	-37.2405
0.163077	-40.7158
0.1375	-41.3729
0.494167	-44.4949
0.41	-46.1504
0.122222	-47.4635
0.9025	-48.0157
0.548	-49.7419
0.5125	-51.8013
0.156667	-55.8359
0.205833	-72.8362
0.474286	-79.669
0.474444	-116.907
0.2425	-134.452

## Sheet: Dk
Quantiles	1	0.95	0.0075	0.005
0.561667	23.5801
0.141	14.9209
0.223333	12.6266
0.18625	11.7602
0.182222	11.3788
0.305	10.9448
0.78	10.8887
0.762222	10.8181
0.405833	10.688
0.269	10.2448
0.579167	10.2055
0.258	9.89439
0.262222	9.87523
0.346667	9.473
0.624167	9.45353
0.427778	9.36972
0.755556	9.22786
0.262222	9.13386
0.871667	8.94405
0.597	8.8138
0.567778	8.81162
0.505	8.74783
0.207778	8.51258
0.712222	8.4545
0.06	8.40157
0.662222	8.3903
0.719167	8.37058
0.504167	8.23363
0.576667	8.22413
0.9325	8.21726
0.097	8.21629
0.421111	8.19976
0.281111	8.18087
0.351111	8.11348
0.527778	8.01143
0.813	7.97288
0.7775	7.95703	7.95703
0.654667	7.94277	7.94277
0.4625	7.76725	7.76725
0.622222	7.67761	7.67761
0.166	7.64487	7.64487
0.873	7.63415	7.63415
0.298182	7.49386	7.49386
0.8925	7.48092	7.48092
0.617778	7.46878	7.46878
0.612	7.40319	7.40319
0.500833	7.34181	7.34181
0.49	7.27442	7.27442
0.0772727	7.22162	7.22162
0.2525	7.17854	7.17854
0.879167	7.1754	7.1754
0.174444	6.9105	6.9105
0.282222	6.83455	6.83455
0.111	6.76851	6.76851
0.240667	6.76842	6.76842
0.895556	6.70531	6.70531
0.836667	6.69968	6.69968
0.478667	6.63724	6.63724
0.7675	6.60874	6.60874
0.361667	6.58236	6.58236
0.656667	6.55504	6.55504
0.185556	6.53304	6.53304
0.319167	6.46998	6.46998
0.330833	6.46881	6.46881
0.751111	6.44794	6.44794
0.048	6.44389	6.44389
0.515833	6.44143	6.44143
0.220833	6.39758	6.39758
0.805	6.36684	6.36684
0.6525	6.36387	6.36387
0.0781818	6.34034	6.34034
0.905	6.26805	6.26805
0.363	6.23332	6.23332
0.426667	6.19923	6.19923
0.164444	6.11211	6.11211
0.74	6.08579	6.08579
0.616	6.03115	6.03115
0.747778	5.9749	5.9749
0.368571	5.93584	5.93584
0.695	5.91443	5.91443
0.278333	5.88649	5.88649
0.517778	5.86852	5.86852
0.476667	5.84783	5.84783
0.485455	5.80606	5.80606
0.294167	5.78145	5.78145
0.286667	5.75223	5.75223
0.4475	5.6871	5.6871
0.603333	5.6416	5.6416
0.411667	5.52622	5.52622
0.683333	5.51831	5.51831
0.7875	5.49856	5.49856
0.429231	5.45026	5.45026
0.650833	5.41828	5.41828
0.644444	5.24546	5.24546
0.859167	5.21448	5.21448
0.174444	5.21264	5.21264
0.297333	5.21157	5.21157
0.226	5.17227	5.17227
0.15	5.14693	5.14693
0.0453333	5.1233	5.1233
0.687	5.11495	5.11495
0.364	5.07471	5.07471
0.14	4.982	4.982
0.843333	4.93619	4.93619
0.204	4.93455	4.93455
0.5475	4.90819	4.90819
0.417333	4.87035	4.87035
0.524444	4.83437	4.83437
0.615	4.79145	4.79145
0.76125	4.72822	4.72822
0.766667	4.69784	4.69784
0.734444	4.68664	4.68664
0.985556	4.62216	4.62216
0.494167	4.59258	4.59258
0.655	4.58886	4.58886
0.585556	4.56137	4.56137
0.240833	4.53202	4.53202
0.353333	4.48395	4.48395
0.161111	4.44911	4.44911
0.475	4.40937	4.40937
0.8	4.38993	4.38993
0.1375	4.37393	4.37393
0.231429	4.35973	4.35973
0.186	4.34572	4.34572
0.063	4.33373	4.33373
0.329	4.31791	4.31791
0.779167	4.28689	4.28689
0.7325	4.26872	4.26872
0.784167	4.25255	4.25255
0.531429	4.2387	4.2387
0.192727	4.22594	4.22594
0.273333	4.21743	4.21743
0.255556	4.19502	4.19502
0.7825	4.17286	4.17286
0.47	4.17115	4.17115
0.919	4.13822	4.13822
0.743333	4.12319	4.12319
0.416667	4.10099	4.10099
0.95625	4.10029	4.10029
0.628889	4.07546	4.07546
0.670667	4.05398	4.05398
0.942667	4.04167	4.04167
0.463	4.03572	4.03572
0.476667	4.01346	4.01346
0.1375	3.98368	3.98368
0.375333	3.97561	3.97561
0.778333	3.91331	3.91331
0.577778	3.90259	3.90259
0.044	3.8959	3.8959
0.773333	3.89197	3.89197
0.438	3.89185	3.89185
0.656667	3.87664	3.87664
0.542	3.82825	3.82825
0.579167	3.81436	3.81436
0.619	3.80341	3.80341
0.478	3.77163	3.77163
0.63	3.73157	3.73157
0.204286	3.70634	3.70634
0.772222	3.67556	3.67556
0.49375	3.65981	3.65981
0.908889	3.65527	3.65527
0.260909	3.65294	3.65294
0.622222	3.63878	3.63878
0.560909	3.63269	3.63269
0.753333	3.62995	3.62995
0.289091	3.62913	3.62913
0.384545	3.60177	3.60177
0.316667	3.57585	3.57585
0.656667	3.55356	3.55356
0.354167	3.54721	3.54721
0.403	3.53472	3.53472
0.691	3.52491	3.52491
0.206	3.52024	3.52024
0.17875	3.50686	3.50686
0.528571	3.46028	3.46028
0.461667	3.44903	3.44903
0.5825	3.44703	3.44703	3.44703
0.180833	3.44366	3.44366	3.44366
0.4525	3.44007	3.44007	3.44007
0.15	3.43601	3.43601	3.43601
0.847778	3.43061	3.43061	3.43061
0.924167	3.41949	3.41949	3.41949
0.736667	3.39939	3.39939	3.39939
0.2975	3.39024	3.39024	3.39024
0.491111	3.3483	3.3483	3.3483
0.218333	3.3387	3.3387	3.3387
0.828182	3.32471	3.32471	3.32471
0.771	3.31957	3.31957	3.31957
0.322857	3.29966	3.29966	3.29966
0.647143	3.26701	3.26701	3.26701
0.267273	3.26633	3.26633	3.26633
0.348333	3.24067	3.24067	3.24067
0.596667	3.22088	3.22088	3.22088
0.372727	3.18836	3.18836	3.18836
0.615	3.15407	3.15407	3.15407
0.415833	3.12776	3.12776	3.12776
0.838889	3.12614	3.12614	3.12614
0.68	3.12562	3.12562	3.12562
0.51625	3.12521	3.12521	3.12521
0.3	3.10634	3.10634	3.10634
0.365556	3.08899	3.08899	3.08899
0.605833	3.07526	3.07526	3.07526
0.783333	3.06525	3.06525	3.06525
0.935455	3.05484	3.05484	3.05484
0.834167	3.03024	3.03024	3.03024
0.414444	3.01344	3.01344	3.01344
0.672727	3.00129	3.00129	3.00129
0.463333	2.98135	2.98135	2.98135
0.535556	2.98001	2.98001	2.98001
0.256	2.96776	2.96776	2.96776
0.178667	2.94238	2.94238	2.94238
0.664444	2.93128	2.93128	2.93128
0.415833	2.92586	2.92586	2.92586
0.474545	2.92377	2.92377	2.92377
0.153636	2.89698	2.89698	2.89698
0.528889	2.89145	2.89145	2.89145
0.259091	2.8898	2.8898	2.8898
0.826154	2.88426	2.88426	2.88426
0.958889	2.88122	2.88122	2.88122
0.623333	2.87814	2.87814	2.87814
0.804444	2.8748	2.8748	2.8748
0.0433333	2.87205	2.87205	2.87205
0.790833	2.8628	2.8628	2.8628
0.5425	2.86087	2.86087	2.86087
0.152222	2.85647	2.85647	2.85647
0.228333	2.85546	2.85546	2.85546
0.482	2.85347	2.85347	2.85347
0.656667	2.84609	2.84609	2.84609
0.985	2.82488	2.82488	2.82488
0.4	2.82124	2.82124	2.82124
0.6525	2.82121	2.82121	2.82121
0.716	2.81498	2.81498	2.81498
0.244545	2.80687	2.80687	2.80687
0.567333	2.79063	2.79063	2.79063
0.4	2.77792	2.77792	2.77792
0.148333	2.77419	2.77419	2.77419
0.321429	2.76298	2.76298	2.76298
0.1025	2.75348	2.75348	2.75348
0.373333	2.75294	2.75294	2.75294
0.595556	2.74163	2.74163	2.74163
0.796667	2.7316	2.7316	2.7316
0.453	2.72661	2.72661	2.72661
0.292308	2.72224	2.72224	2.72224
0.66875	2.71529	2.71529	2.71529
0.399167	2.7084	2.7084	2.7084
0.9325	2.708	2.708	2.708
0.141111	2.69765	2.69765	2.69765
0.307778	2.69168	2.69168	2.69168
0.2975	2.68531	2.68531	2.68531
0.715556	2.68339	2.68339	2.68339
0.413333	2.67014	2.67014	2.67014
0.0344444	2.65511	2.65511	2.65511
0.395385	2.64866	2.64866	2.64866
0.885	2.64448	2.64448	2.64448
0.5125	2.63104	2.63104	2.63104
0.867778	2.62765	2.62765	2.62765
0.271111	2.62149	2.62149	2.62149
0.819333	2.6188	2.6188	2.6188
0.294444	2.61381	2.61381	2.61381
0.784	2.61344	2.61344	2.61344
0.64	2.6112	2.6112	2.6112
0.411	2.60685	2.60685	2.60685
0.7125	2.58248	2.58248	2.58248
0.34125	2.57064	2.57064	2.57064
0.615455	2.5613	2.5613	2.5613
0.202222	2.54357	2.54357	2.54357
0.468	2.53302	2.53302	2.53302
0.935	2.52461	2.52461	2.52461
0.427778	2.52041	2.52041	2.52041
0.994545	2.51616	2.51616	2.51616
0.388	2.50664	2.50664	2.50664
0.308182	2.50301	2.50301	2.50301
0.3875	2.49863	2.49863	2.49863
0.333636	2.49765	2.49765	2.49765
0.467273	2.48573	2.48573	2.48573
0.443333	2.4855	2.4855	2.4855
0.9425	2.48251	2.48251	2.48251
0.718889	2.47151	2.47151	2.47151
0.772222	2.47004	2.47004	2.47004
0.525556	2.46812	2.46812	2.46812
0.547778	2.46264	2.46264	2.46264
0.58125	2.45475	2.45475	2.45475
0.420833	2.44402	2.44402	2.44402
0.0706667	2.43566	2.43566	2.43566
0.620833	2.42415	2.42415	2.42415
0.145455	2.41914	2.41914	2.41914
0.5675	2.41803	2.41803	2.41803
0.665455	2.40723	2.40723	2.40723
0.348889	2.39346	2.39346	2.39346
0.948182	2.39027	2.39027	2.39027
0.698889	2.38751	2.38751	2.38751
0.734167	2.3855	2.3855	2.3855
0.26	2.3685	2.3685	2.3685
0.890667	2.3478	2.3478	2.3478
0.654167	2.34145	2.34145	2.34145
0.679	2.33363	2.33363	2.33363
0.236667	2.33261	2.33261	2.33261
0.525	2.33149	2.33149	2.33149
0.6675	2.329	2.329	2.329
0.709	2.3261	2.3261	2.3261
0.426923	2.32055	2.32055	2.32055
0.828333	2.31963	2.31963	2.31963
0.760909	2.31668	2.31668	2.31668
0.854444	2.31397	2.31397	2.31397
0.944545	2.31265	2.31265	2.31265
0.379	2.27743	2.27743	2.27743
0.658	2.27684	2.27684	2.27684
0.292667	2.25864	2.25864	2.25864
0.976667	2.25836	2.25836	2.25836
0.0745455	2.2518	2.2518	2.2518
0.255	2.24718	2.24718	2.24718
0.594444	2.24289	2.24289	2.24289
0.56875	2.23627	2.23627	2.23627
0.19	2.21348	2.21348	2.21348
0.632	2.20366	2.20366	2.20366
0.404286	2.19733	2.19733	2.19733
0.143636	2.19431	2.19431	2.19431
0.597778	2.19198	2.19198	2.19198
0.564	2.18637	2.18637	2.18637
0.76	2.17463	2.17463	2.17463
0.893333	2.17414	2.17414	2.17414
0.188889	2.17206	2.17206	2.17206
0.61	2.1625	2.1625	2.1625
0.401111	2.15954	2.15954	2.15954
0.628333	2.14694	2.14694	2.14694
0.229091	2.13057	2.13057	2.13057
0.720909	2.1295	2.1295	2.1295
0.778333	2.09957	2.09957	2.09957
0.9625	2.09343	2.09343	2.09343
0.338333	2.08004	2.08004	2.08004
0.836667	2.06277	2.06277	2.06277
0.514	2.05718	2.05718	2.05718
0.621333	2.04975	2.04975	2.04975
0.626667	2.04134	2.04134	2.04134
0.371333	1.9948	1.9948	1.9948
0.684	1.98599	1.98599	1.98599
0.91625	1.98209	1.98209	1.98209
0.715	1.97836	1.97836	1.97836
0.718	1.96966	1.96966	1.96966
0.958182	1.96954	1.96954	1.96954
0.741111	1.96674	1.96674	1.96674
0.568889	1.96128	1.96128	1.96128
0.914	1.95143	1.95143	1.95143
0.694	1.93622	1.93622	1.93622
0.668182	1.93232	1.93232	1.93232
0.188	1.93141	1.93141	1.93141
0.462667	1.92361	1.92361	1.92361
0.202222	1.92131	1.92131	1.92131
0.452222	1.91724	1.91724	1.91724
0.975	1.90229	1.90229	1.90229
0.113333	1.89688	1.89688	1.89688
0.576667	1.89106	1.89106	1.89106
0.88	1.89013	1.89013	1.89013	1.89013
0.73875	1.84667	1.84667	1.84667	1.84667
0.717273	1.83733	1.83733	1.83733	1.83733
0.191	1.83513	1.83513	1.83513	1.83513
0.83	1.83203	1.83203	1.83203	1.83203
0.551111	1.83168	1.83168	1.83168	1.83168
0.0355556	1.82001	1.82001	1.82001	1.82001
0.8925	1.81958	1.81958	1.81958	1.81958
0.585556	1.8014	1.8014	1.8014	1.8014
0.136364	1.79604	1.79604	1.79604	1.79604
0.635	1.79177	1.79177	1.79177	1.79177
0.743333	1.78241	1.78241	1.78241	1.78241
0.745	1.77235	1.77235	1.77235	1.77235
0.956667	1.76888	1.76888	1.76888	1.76888
0.850833	1.75388	1.75388	1.75388	1.75388
0.575	1.75231	1.75231	1.75231	1.75231
0.516667	1.75166	1.75166	1.75166	1.75166
0.692727	1.74841	1.74841	1.74841	1.74841
0.0973333	1.74607	1.74607	1.74607	1.74607
0.312222	1.7444	1.7444	1.7444	1.7444
0.58	1.73823	1.73823	1.73823	1.73823
0.426667	1.72678	1.72678	1.72678	1.72678
0.813333	1.72326	1.72326	1.72326	1.72326
0.691	1.72094	1.72094	1.72094	1.72094
0.73375	1.70786	1.70786	1.70786	1.70786
0.318333	1.69905	1.69905	1.69905	1.69905
0.108	1.69312	1.69312	1.69312	1.69312
0.769091	1.69285	1.69285	1.69285	1.69285
0.956667	1.67076	1.67076	1.67076	1.67076
0.905556	1.65598	1.65598	1.65598	1.65598
0.9375	1.65531	1.65531	1.65531	1.65531
0.5325	1.65529	1.65529	1.65529	1.65529
0.63	1.65392	1.65392	1.65392	1.65392
0.6575	1.65246	1.65246	1.65246	1.65246
0.422727	1.65086	1.65086	1.65086	1.65086
0.516667	1.64977	1.64977	1.64977	1.64977
0.441111	1.64534	1.64534	1.64534	1.64534
0.646364	1.63681	1.63681	1.63681	1.63681
0.902222	1.63666	1.63666	1.63666	1.63666
0.826667	1.63644	1.63644	1.63644	1.63644
0.646667	1.63563	1.63563	1.63563	1.63563
0.203333	1.63291	1.63291	1.63291	1.63291
0.434545	1.62781	1.62781	1.62781	1.62781
0.74125	1.62584	1.62584	1.62584	1.62584
0.22	1.62568	1.62568	1.62568	1.62568
0.389	1.6203	1.6203	1.6203	1.6203
0.279	1.61881	1.61881	1.61881	1.61881
0.0763636	1.61822	1.61822	1.61822	1.61822
0.880909	1.61461	1.61461	1.61461	1.61461
0.4725	1.61328	1.61328	1.61328	1.61328
0.955455	1.60999	1.60999	1.60999	1.60999
0.562	1.59733	1.59733	1.59733	1.59733
0.4025	1.59708	1.59708	1.59708	1.59708
0.645	1.5963	1.5963	1.5963	1.5963
0.324167	1.59421	1.59421	1.59421	1.59421
0.39	1.59376	1.59376	1.59376	1.59376
0.955	1.58272	1.58272	1.58272	1.58272
0.735	1.57509	1.57509	1.57509	1.57509
0.370833	1.56583	1.56583	1.56583	1.56583
0.882222	1.55844	1.55844	1.55844	1.55844
0.3625	1.55018	1.55018	1.55018	1.55018
0.448889	1.53954	1.53954	1.53954	1.53954
0.87875	1.53494	1.53494	1.53494	1.53494
0.390909	1.52933	1.52933	1.52933	1.52933
0.804	1.521	1.521	1.521	1.521
0.65625	1.52064	1.52064	1.52064	1.52064
0.688667	1.52063	1.52063	1.52063	1.52063
0.494444	1.51428	1.51428	1.51428	1.51428
0.6275	1.5122	1.5122	1.5122	1.5122
0.943333	1.5035	1.5035	1.5035	1.5035
0.941111	1.48354	1.48354	1.48354	1.48354
0.122222	1.48294	1.48294	1.48294	1.48294
0.485	1.48134	1.48134	1.48134	1.48134
0.707143	1.47977	1.47977	1.47977	1.47977
0.39	1.47504	1.47504	1.47504	1.47504
0.0988889	1.47266	1.47266	1.47266	1.47266
0.397	1.47202	1.47202	1.47202	1.47202
0.151111	1.47194	1.47194	1.47194	1.47194
0.765	1.46181	1.46181	1.46181	1.46181
0.325556	1.46044	1.46044	1.46044	1.46044
0.368889	1.45685	1.45685	1.45685	1.45685
0.96	1.45269	1.45269	1.45269	1.45269
0.307273	1.45237	1.45237	1.45237	1.45237
0.29	1.44568	1.44568	1.44568	1.44568
0.4225	1.43106	1.43106	1.43106	1.43106
0.125556	1.42141	1.42141	1.42141	1.42141
0.962727	1.41898	1.41898	1.41898	1.41898
0.921111	1.41774	1.41774	1.41774	1.41774
0.887273	1.41753	1.41753	1.41753	1.41753
0.388889	1.4175	1.4175	1.4175	1.4175
0.6	1.39737	1.39737	1.39737	1.39737
0.656667	1.38687	1.38687	1.38687	1.38687
0.967273	1.37324	1.37324	1.37324	1.37324
0.705556	1.34788	1.34788	1.34788	1.34788
0.585	1.34541	1.34541	1.34541	1.34541
0.35	1.34055	1.34055	1.34055	1.34055
0.422727	1.33819	1.33819	1.33819	1.33819
0.576667	1.33654	1.33654	1.33654	1.33654
0.358667	1.33406	1.33406	1.33406	1.33406
0.558667	1.33331	1.33331	1.33331	1.33331
0.334	1.33048	1.33048	1.33048	1.33048
0.8875	1.32837	1.32837	1.32837	1.32837
0.025	1.31496	1.31496	1.31496	1.31496
0.687333	1.31475	1.31475	1.31475	1.31475
0.721667	1.31419	1.31419	1.31419	1.31419
0.15375	1.31329	1.31329	1.31329	1.31329
0.940833	1.31189	1.31189	1.31189	1.31189
0.581111	1.30545	1.30545	1.30545	1.30545
0.8175	1.30183	1.30183	1.30183	1.30183
0.619231	1.29976	1.29976	1.29976	1.29976
0.398	1.2977	1.2977	1.2977	1.2977
0.733333	1.2942	1.2942	1.2942	1.2942
0.272222	1.29313	1.29313	1.29313	1.29313
0.750909	1.29275	1.29275	1.29275	1.29275
0.714545	1.28981	1.28981	1.28981	1.28981
0.67	1.28621	1.28621	1.28621	1.28621
0.856711	1.2827	1.2827	1.2827	1.2827
0.59875	1.27511	1.27511	1.27511	1.27511
0.922	1.26965	1.26965	1.26965	1.26965
0.692222	1.26641	1.26641	1.26641	1.26641
0.404	1.25976	1.25976	1.25976	1.25976
0.46	1.24855	1.24855	1.24855	1.24855
0.591667	1.2467	1.2467	1.2467	1.2467
0.603333	1.24194	1.24194	1.24194	1.24194
0.41	1.23865	1.23865	1.23865	1.23865
0.293333	1.23865	1.23865	1.23865	1.23865
0.6	1.23324	1.23324	1.23324	1.23324
0.5575	1.23234	1.23234	1.23234	1.23234
0.399	1.22959	1.22959	1.22959	1.22959
0.711538	1.22131	1.22131	1.22131	1.22131
0.23875	1.21715	1.21715	1.21715	1.21715
0.467692	1.21361	1.21361	1.21361	1.21361
0.638889	1.2099	1.2099	1.2099	1.2099
0.346667	1.20326	1.20326	1.20326	1.20326
0.65	1.19722	1.19722	1.19722	1.19722
0.43	1.18753	1.18753	1.18753	1.18753
0.386364	1.17409	1.17409	1.17409	1.17409
0.521111	1.16706	1.16706	1.16706	1.16706
0.90625	1.14966	1.14966	1.14966	1.14966
0.645	1.12884	1.12884	1.12884	1.12884
0.507273	1.12679	1.12679	1.12679	1.12679
0.410667	1.12674	1.12674	1.12674	1.12674
0.552	1.11118	1.11118	1.11118	1.11118
0.886667	1.10847	1.10847	1.10847	1.10847
0.588182	1.09797	1.09797	1.09797	1.09797
0.396667	1.09578	1.09578	1.09578	1.09578
0.647778	1.08607	1.08607	1.08607	1.08607
0.535	1.0637	1.0637	1.0637	1.0637
0.525	1.06163	1.06163	1.06163	1.06163
0.37	1.06087	1.06087	1.06087	1.06087
0.572222	1.05593	1.05593	1.05593	1.05593
0.53	1.05161	1.05161	1.05161	1.05161
0.92625	1.05151	1.05151	1.05151	1.05151
0.150833	1.04146	1.04146	1.04146	1.04146
0.938182	1.03491	1.03491	1.03491	1.03491
0.531	1.03223	1.03223	1.03223	1.03223
0.31	1.02785	1.02785	1.02785	1.02785
0.525556	1.02624	1.02624	1.02624	1.02624
0.613	1.00124	1.00124	1.00124	1.00124
0.063	0.99688	0.99688	0.99688	0.99688
0.738889	0.99136	0.99136	0.99136	0.99136
0.41	0.98448	0.98448	0.98448	0.98448
0.931429	0.97729	0.97729	0.97729	0.97729
0.504545	0.97586	0.97586	0.97586	0.97586
0.753636	0.97559	0.97559	0.97559	0.97559
0.347778	0.96942	0.96942	0.96942	0.96942
0.649167	0.962	0.962	0.962	0.962
0.640833	0.95732	0.95732	0.95732	0.95732
0.33	0.95541	0.95541	0.95541	0.95541
0.353636	0.9543	0.9543	0.9543	0.9543
0.4075	0.95172	0.95172	0.95172	0.95172
0.22	0.94506	0.94506	0.94506	0.94506
0.35	0.92914	0.92914	0.92914	0.92914
0.202222	0.91288	0.91288	0.91288	0.91288
0.632857	0.90767	0.90767	0.90767	0.90767
0.58625	0.90466	0.90466	0.90466	0.90466
0.5775	0.90449	0.90449	0.90449	0.90449
0.10625	0.89977	0.89977	0.89977	0.89977
0.91	0.8996	0.8996	0.8996	0.8996
0.5375	0.89737	0.89737	0.89737	0.89737
0.805	0.89285	0.89285	0.89285	0.89285
0.422727	0.878	0.878	0.878	0.878
0.724667	0.86926	0.86926	0.86926	0.86926
0.424	0.85508	0.85508	0.85508	0.85508
0.836	0.85139	0.85139	0.85139	0.85139
0.247	0.85108	0.85108	0.85108	0.85108
0.641667	0.83773	0.83773	0.83773	0.83773
0.573333	0.83351	0.83351	0.83351	0.83351
0.728333	0.83097	0.83097	0.83097	0.83097
0.65875	0.82378	0.82378	0.82378	0.82378
0.55	0.81896	0.81896	0.81896	0.81896
0.413333	0.81415	0.81415	0.81415	0.81415
0.897778	0.79919	0.79919	0.79919	0.79919
0.402	0.79854	0.79854	0.79854	0.79854
0.87	0.79561	0.79561	0.79561	0.79561
0.896667	0.78292	0.78292	0.78292	0.78292
0.49	0.77076	0.77076	0.77076	0.77076
0.683333	0.74801	0.74801	0.74801	0.74801
0.305556	0.74735	0.74735	0.74735	0.74735
0.857778	0.74464	0.74464	0.74464	0.74464
0.159167	0.74174	0.74174	0.74174	0.74174
0.35	0.74028	0.74028	0.74028	0.74028
0.656667	0.73884	0.73884	0.73884	0.73884
0.376	0.73662	0.73662	0.73662	0.73662
0.626667	0.73171	0.73171	0.73171	0.73171
0.828	0.73096	0.73096	0.73096	0.73096
0.7625	0.72284	0.72284	0.72284	0.72284
0.297778	0.71851	0.71851	0.71851	0.71851
0.8775	0.70333	0.70333	0.70333	0.70333
0.794545	0.70042	0.70042	0.70042	0.70042
0.592	0.69611	0.69611	0.69611	0.69611
0.51	0.69091	0.69091	0.69091	0.69091
0.609167	0.68613	0.68613	0.68613	0.68613
0.74625	0.6822	0.6822	0.6822	0.6822
0.13	0.66258	0.66258	0.66258	0.66258
0.503333	0.66038	0.66038	0.66038	0.66038
0.723333	0.65673	0.65673	0.65673	0.65673
0.518889	0.6561	0.6561	0.6561	0.6561
0.638333	0.64554	0.64554	0.64554	0.64554
0.367	0.6399	0.6399	0.6399	0.6399
0.524444	0.63842	0.63842	0.63842	0.63842
0.66	0.63214	0.63214	0.63214	0.63214
0.771429	0.63051	0.63051	0.63051	0.63051
0.484615	0.62358	0.62358	0.62358	0.62358
0.668462	0.61752	0.61752	0.61752	0.61752
0.0408333	0.61651	0.61651	0.61651	0.61651
0.390667	0.61605	0.61605	0.61605	0.61605
0.51	0.61204	0.61204	0.61204	0.61204
0.39875	0.59444	0.59444	0.59444	0.59444
0.185	0.58881	0.58881	0.58881	0.58881
0.14125	0.58851	0.58851	0.58851	0.58851
0.75	0.58787	0.58787	0.58787	0.58787
0.20875	0.58749	0.58749	0.58749	0.58749
0.118333	0.58674	0.58674	0.58674	0.58674
0.1125	0.5863	0.5863	0.5863	0.5863
0.605556	0.58118	0.58118	0.58118	0.58118
0.393333	0.57958	0.57958	0.57958	0.57958
0.433333	0.57081	0.57081	0.57081	0.57081
0.4525	0.56767	0.56767	0.56767	0.56767
0.823333	0.56582	0.56582	0.56582	0.56582
0.374167	0.55701	0.55701	0.55701	0.55701
0.5375	0.5554	0.5554	0.5554	0.5554
0.40625	0.54279	0.54279	0.54279	0.54279
0.686667	0.54194	0.54194	0.54194	0.54194
0.70125	0.53804	0.53804	0.53804	0.53804
0.204167	0.53773	0.53773	0.53773	0.53773
0.949167	0.53663	0.53663	0.53663	0.53663
0.988182	0.52853	0.52853	0.52853	0.52853
0.868333	0.52711	0.52711	0.52711	0.52711
0.556667	0.52661	0.52661	0.52661	0.52661
0.20625	0.5206	0.5206	0.5206	0.5206
0.69375	0.51981	0.51981	0.51981	0.51981
0.725556	0.50795	0.50795	0.50795	0.50795
0.65625	0.50621	0.50621	0.50621	0.50621
0.704	0.50374	0.50374	0.50374	0.50374
0.923636	0.49956	0.49956	0.49956	0.49956
0.532222	0.49596	0.49596	0.49596	0.49596
0.93	0.49502	0.49502	0.49502	0.49502
0.0763636	0.49137	0.49137	0.49137	0.49137
0.53125	0.48775	0.48775	0.48775	0.48775
0.68	0.48209	0.48209	0.48209	0.48209
0.27875	0.48006	0.48006	0.48006	0.48006
0.43875	0.47788	0.47788	0.47788	0.47788
	0.46697	0.46697	0.46697	0.46697
0.67	0.46185	0.46185	0.46185	0.46185
0.3075	0.45781	0.45781	0.45781	0.45781
0.814	0.45267	0.45267	0.45267	0.45267
0.07375	0.44964	0.44964	0.44964	0.44964
0.806667	0.44545	0.44545	0.44545	0.44545
0.605	0.43233	0.43233	0.43233	0.43233
0.494444	0.43063	0.43063	0.43063	0.43063
0.685	0.42732	0.42732	0.42732	0.42732
0.527778	0.42597	0.42597	0.42597	0.42597
0.369167	0.41703	0.41703	0.41703	0.41703
0.848182	0.41299	0.41299	0.41299	0.41299
0.635556	0.40734	0.40734	0.40734	0.40734
0.635556	0.39349	0.39349	0.39349	0.39349
0.0922222	0.38953	0.38953	0.38953	0.38953
0.450833	0.38271	0.38271	0.38271	0.38271
0.274667	0.36357	0.36357	0.36357	0.36357
0.221	0.35879	0.35879	0.35879	0.35879
0.508889	0.35872	0.35872	0.35872	0.35872
0.594444	0.35695	0.35695	0.35695	0.35695
0.885	0.34974	0.34974	0.34974	0.34974
0.326	0.349	0.349	0.349	0.349
0.346667	0.34363	0.34363	0.34363	0.34363
0.739091	0.34217	0.34217	0.34217	0.34217
0.518	0.32993	0.32993	0.32993	0.32993
0.933333	0.32323	0.32323	0.32323	0.32323
0.354167	0.32064	0.32064	0.32064	0.32064
0.514545	0.31763	0.31763	0.31763	0.31763
0.644444	0.31614	0.31614	0.31614	0.31614
0.86	0.31174	0.31174	0.31174	0.31174
0.0911111	0.30761	0.30761	0.30761	0.30761
0.635	0.30508	0.30508	0.30508	0.30508
0.413636	0.30285	0.30285	0.30285	0.30285
0.677	0.29066	0.29066	0.29066	0.29066
0.386667	0.29	0.29	0.29	0.29
0.344167	0.28913	0.28913	0.28913	0.28913
0.57375	0.27903	0.27903	0.27903	0.27903
0.807778	0.27495	0.27495	0.27495	0.27495
0.401	0.25911	0.25911	0.25911	0.25911
0.615	0.25721	0.25721	0.25721	0.25721
0.39	0.2515	0.2515	0.2515	0.2515
0.609	0.25103	0.25103	0.25103	0.25103
0.904444	0.24715	0.24715	0.24715	0.24715
0.279	0.24512	0.24512	0.24512	0.24512
0.754444	0.23711	0.23711	0.23711	0.23711
0.6575	0.23691	0.23691	0.23691	0.23691
0.557143	0.21523	0.21523	0.21523	0.21523
0.413636	0.20984	0.20984	0.20984	0.20984
0.423333	0.20943	0.20943	0.20943	0.20943
0.773	0.20833	0.20833	0.20833	0.20833
0.46375	0.20623	0.20623	0.20623	0.20623
0.655833	0.19802	0.19802	0.19802	0.19802
0.1525	0.18603	0.18603	0.18603	0.18603
0.871667	0.18068	0.18068	0.18068	0.18068
0.140667	0.17802	0.17802	0.17802	0.17802
0.841429	0.17701	0.17701	0.17701	0.17701
0.554444	0.16535	0.16535	0.16535	0.16535
0.3675	0.1501	0.1501	0.1501	0.1501
0.732727	0.1456	0.1456	0.1456	0.1456
0.66	0.13762	0.13762	0.13762	0.13762
0.718333	0.1277	0.1277	0.1277	0.1277
0.927	0.1265	0.1265	0.1265	0.1265
0.1625	0.11938	0.11938	0.11938	0.11938
0.184545	0.10534	0.10534	0.10534	0.10534
0.486364	0.10219	0.10219	0.10219	0.10219
0.728889	0.10092	0.10092	0.10092	0.10092
0.772308	0.0953	0.0953	0.0953	0.0953
0.64	0.09485	0.09485	0.09485	0.09485
0.37125	0.0934	0.0934	0.0934	0.0934
0.4925	0.08561	0.08561	0.08561	0.08561
0.76	0.08113	0.08113	0.08113	0.08113
0.244167	0.08052	0.08052	0.08052	0.08052
0.53	0.0758	0.0758	0.0758	0.0758
0.923636	0.07289	0.07289	0.07289	0.07289
0.540909	0.06362	0.06362	0.06362	0.06362
0.9725	0.05993	0.05993	0.05993	0.05993
0.841111	0.05614	0.05614	0.05614	0.05614
0.679167	0.0515	0.0515	0.0515	0.0515
0.185	0.0373	0.0373	0.0373	0.0373
0.857778	0.03692	0.03692	0.03692	0.03692
0.35	0.03117	0.03117	0.03117	0.03117
0.425455	0.02856	0.02856	0.02856	0.02856
0.6	0.02795	0.02795	0.02795	0.02795
0.62	0.02298	0.02298	0.02298	0.02298
0.281667	0.01463	0.01463	0.01463	0.01463
0.949091	0.01123	0.01123	0.01123	0.01123
0.773333	0.0095	0.0095	0.0095	0.0095
0.651667	0.00402	0.00402	0.00402	0.00402
0.742	0.00238	0.00238	0.00238	0.00238
0.084	-0.00046	-0.00046	-0.00046	-0.00046
0.5475	-0.00502	-0.00502	-0.00502	-0.00502
0.3825	-0.00584	-0.00584	-0.00584	-0.00584
0.67	-0.00738	-0.00738	-0.00738	-0.00738
0.388667	-0.01144	-0.01144	-0.01144	-0.01144
0.693333	-0.0202	-0.0202	-0.0202	-0.0202
0.454167	-0.02167	-0.02167	-0.02167	-0.02167
0.69	-0.04401	-0.04401	-0.04401	-0.04401
0.401667	-0.05386	-0.05386	-0.05386	-0.05386
0.794444	-0.06196	-0.06196	-0.06196	-0.06196
0.695	-0.06311	-0.06311	-0.06311	-0.06311
0.753333	-0.07197	-0.07197	-0.07197	-0.07197
0.421	-0.07246	-0.07246	-0.07246	-0.07246
0.61	-0.08449	-0.08449	-0.08449	-0.08449
0.483333	-0.09291	-0.09291	-0.09291	-0.09291
0.851538	-0.0971	-0.0971	-0.0971	-0.0971
0.581429	-0.10101	-0.10101	-0.10101	-0.10101
0.78	-0.10851	-0.10851	-0.10851	-0.10851
0.847333	-0.11266	-0.11266	-0.11266	-0.11266
0.84	-0.11291	-0.11291	-0.11291	-0.11291
0.633333	-0.11973	-0.11973	-0.11973	-0.11973
0.546667	-0.12069	-0.12069	-0.12069	-0.12069
0.417273	-0.12104	-0.12104	-0.12104	-0.12104
0.36125	-0.13023	-0.13023	-0.13023	-0.13023
0.404444	-0.13385	-0.13385	-0.13385	-0.13385
0.4925	-0.13442	-0.13442	-0.13442	-0.13442
0.4725	-0.14009	-0.14009	-0.14009	-0.14009
0.988889	-0.14061	-0.14061	-0.14061	-0.14061
0.79	-0.14871	-0.14871	-0.14871	-0.14871
0.136667	-0.15377	-0.15377	-0.15377	-0.15377
0.707	-0.1576	-0.1576	-0.1576	-0.1576
0.828571	-0.16057	-0.16057	-0.16057	-0.16057
0.395	-0.16103	-0.16103	-0.16103	-0.16103
0.366667	-0.16404	-0.16404	-0.16404	-0.16404
0.411111	-0.16999	-0.16999	-0.16999	-0.16999
0.920909	-0.17247	-0.17247	-0.17247	-0.17247
0.461667	-0.18247	-0.18247	-0.18247	-0.18247
0.705833	-0.18897	-0.18897	-0.18897	-0.18897
0.751111	-0.19676	-0.19676	-0.19676	-0.19676
0.766364	-0.19677	-0.19677	-0.19677	-0.19677
0.136	-0.19786	-0.19786	-0.19786	-0.19786
0.296667	-0.20692	-0.20692	-0.20692	-0.20692
0.323333	-0.20869	-0.20869	-0.20869	-0.20869
0.426364	-0.20946	-0.20946	-0.20946	-0.20946
0.519231	-0.20987	-0.20987	-0.20987	-0.20987
0.30875	-0.21297	-0.21297	-0.21297	-0.21297
0.451667	-0.22113	-0.22113	-0.22113	-0.22113
0.4025	-0.22219	-0.22219	-0.22219	-0.22219
0.148889	-0.24074	-0.24074	-0.24074	-0.24074
0.83	-0.24166	-0.24166	-0.24166	-0.24166
0.705	-0.24312	-0.24312	-0.24312	-0.24312
0.826	-0.24324	-0.24324	-0.24324	-0.24324
0.46	-0.24424	-0.24424	-0.24424	-0.24424
0.696667	-0.24503	-0.24503	-0.24503	-0.24503
0.992667	-0.24902	-0.24902	-0.24902	-0.24902
0.404286	-0.26671	-0.26671	-0.26671	-0.26671
0.105	-0.27262	-0.27262	-0.27262	-0.27262
0.482	-0.27669	-0.27669	-0.27669	-0.27669
0.214545	-0.28259	-0.28259	-0.28259	-0.28259
0.42625	-0.28991	-0.28991	-0.28991	-0.28991
0.595	-0.29089	-0.29089	-0.29089	-0.29089
0.576667	-0.2936	-0.2936	-0.2936	-0.2936
0.908	-0.29398	-0.29398	-0.29398	-0.29398
0.824167	-0.30387	-0.30387	-0.30387	-0.30387
0.605	-0.30524	-0.30524	-0.30524	-0.30524
0.66	-0.30661	-0.30661	-0.30661	-0.30661
0.835556	-0.30782	-0.30782	-0.30782	-0.30782
0.3	-0.31712	-0.31712	-0.31712	-0.31712
0.919	-0.31753	-0.31753	-0.31753	-0.31753
0.405556	-0.33961	-0.33961	-0.33961	-0.33961
0.940909	-0.34657	-0.34657	-0.34657	-0.34657
0.206364	-0.35972	-0.35972	-0.35972	-0.35972
0.580833	-0.37075	-0.37075	-0.37075	-0.37075
0.2275	-0.37264	-0.37264	-0.37264	-0.37264
0.408	-0.37504	-0.37504	-0.37504	-0.37504
0.43	-0.37605	-0.37605	-0.37605	-0.37605
0.424167	-0.37762	-0.37762	-0.37762	-0.37762
0.654444	-0.38698	-0.38698	-0.38698	-0.38698
0.356667	-0.38984	-0.38984	-0.38984	-0.38984
0.9025	-0.39873	-0.39873	-0.39873	-0.39873
0.806667	-0.40363	-0.40363	-0.40363	-0.40363
0.763846	-0.41107	-0.41107	-0.41107	-0.41107
0.850833	-0.41183	-0.41183	-0.41183	-0.41183
0.744286	-0.41359	-0.41359	-0.41359	-0.41359
0.7025	-0.41461	-0.41461	-0.41461	-0.41461
0.563	-0.42088	-0.42088	-0.42088	-0.42088
0.483333	-0.42192	-0.42192	-0.42192	-0.42192
0.930833	-0.42222	-0.42222	-0.42222	-0.42222
0.862857	-0.4254	-0.4254	-0.4254	-0.4254
0.56875	-0.43161	-0.43161	-0.43161	-0.43161
0.407143	-0.43546	-0.43546	-0.43546	-0.43546
0.4375	-0.4504	-0.4504	-0.4504	-0.4504
0.534615	-0.46997	-0.46997	-0.46997	-0.46997
0.722	-0.47229	-0.47229	-0.47229	-0.47229
0.958333	-0.47275	-0.47275	-0.47275	-0.47275
0.476667	-0.47511	-0.47511	-0.47511	-0.47511
0.368571	-0.48277	-0.48277	-0.48277	-0.48277
0.393333	-0.49104	-0.49104	-0.49104	-0.49104
0.22125	-0.52899	-0.52899	-0.52899	-0.52899
0.675	-0.53116	-0.53116	-0.53116	-0.53116
0.359167	-0.53131	-0.53131	-0.53131	-0.53131
0.872727	-0.53965	-0.53965	-0.53965	-0.53965
0.920909	-0.54008	-0.54008	-0.54008	-0.54008
0.721667	-0.55913	-0.55913	-0.55913	-0.55913
0.4375	-0.56317	-0.56317	-0.56317	-0.56317
0.882727	-0.56656	-0.56656	-0.56656	-0.56656
0.946364	-0.56784	-0.56784	-0.56784	-0.56784
0.658	-0.57194	-0.57194	-0.57194	-0.57194
0.633333	-0.57703	-0.57703	-0.57703	-0.57703
0.223333	-0.57863	-0.57863	-0.57863	-0.57863
0.834545	-0.58274	-0.58274	-0.58274	-0.58274
0.45875	-0.58387	-0.58387	-0.58387	-0.58387
0.771818	-0.58465	-0.58465	-0.58465	-0.58465
0.844	-0.58934	-0.58934	-0.58934	-0.58934
0.4525	-0.5972	-0.5972	-0.5972	-0.5972
0.565	-0.61078	-0.61078	-0.61078	-0.61078
0.358	-0.61478	-0.61478	-0.61478	-0.61478
0.271818	-0.6178	-0.6178	-0.6178	-0.6178
0.706667	-0.62067	-0.62067	-0.62067	-0.62067
0.619091	-0.62545	-0.62545	-0.62545	-0.62545
0.53875	-0.62579	-0.62579	-0.62579	-0.62579
0.83	-0.63439	-0.63439	-0.63439	-0.63439
0.879	-0.64433	-0.64433	-0.64433	-0.64433
0.733333	-0.64906	-0.64906	-0.64906	-0.64906
0.419091	-0.652	-0.652	-0.652	-0.652
0.461111	-0.65211	-0.65211	-0.65211	-0.65211
0.532	-0.6571	-0.6571	-0.6571	-0.6571
0.409	-0.65983	-0.65983	-0.65983	-0.65983
0.760909	-0.66607	-0.66607	-0.66607	-0.66607
0.769	-0.68026	-0.68026	-0.68026	-0.68026
0.688889	-0.68685	-0.68685	-0.68685	-0.68685
0.992667	-0.68754	-0.68754	-0.68754	-0.68754
0.541818	-0.69493	-0.69493	-0.69493	-0.69493
0.651111	-0.70077	-0.70077	-0.70077	-0.70077
0.936667	-0.70292	-0.70292	-0.70292	-0.70292
0.0754545	-0.7102	-0.7102	-0.7102	-0.7102
0.7075	-0.71553	-0.71553	-0.71553	-0.71553
0.235	-0.71573	-0.71573	-0.71573	-0.71573
0.801111	-0.71828	-0.71828	-0.71828	-0.71828
0.35	-0.73614	-0.73614	-0.73614	-0.73614
0.876667	-0.74846	-0.74846	-0.74846	-0.74846
0.17	-0.76919	-0.76919	-0.76919	-0.76919
0.53875	-0.77182	-0.77182	-0.77182	-0.77182
0.488	-0.77204	-0.77204	-0.77204	-0.77204
0.674545	-0.78962	-0.78962	-0.78962	-0.78962
0.655833	-0.81798	-0.81798	-0.81798	-0.81798
0.643	-0.82255	-0.82255	-0.82255	-0.82255
0.631667	-0.82304	-0.82304	-0.82304	-0.82304
0.986667	-0.82324	-0.82324	-0.82324	-0.82324
0.811111	-0.82543	-0.82543	-0.82543	-0.82543
0.462222	-0.83198	-0.83198	-0.83198	-0.83198
0.224	-0.84081	-0.84081	-0.84081	-0.84081
0.625	-0.84545	-0.84545	-0.84545	-0.84545
0.4875	-0.8471	-0.8471	-0.8471	-0.8471
0.58625	-0.84736	-0.84736	-0.84736	-0.84736
0.923333	-0.84956	-0.84956	-0.84956	-0.84956
0.775556	-0.85108	-0.85108	-0.85108	-0.85108
0.64125	-0.85568	-0.85568	-0.85568	-0.85568
0.421	-0.8595	-0.8595	-0.8595	-0.8595
0.383636	-0.85955	-0.85955	-0.85955	-0.85955
0.813333	-0.86297	-0.86297	-0.86297	-0.86297
0.671538	-0.87382	-0.87382	-0.87382	-0.87382
0.94	-0.87638	-0.87638	-0.87638	-0.87638
0.741111	-0.88035	-0.88035	-0.88035	-0.88035
0.756	-0.8877	-0.8877	-0.8877	-0.8877
0.529	-0.88798	-0.88798	-0.88798	-0.88798
0.901667	-0.8925	-0.8925	-0.8925	-0.8925
0.698182	-0.89656	-0.89656	-0.89656	-0.89656
0.826667	-0.90604	-0.90604	-0.90604	-0.90604
0.789	-0.90747	-0.90747	-0.90747	-0.90747
0.415	-0.9084	-0.9084	-0.9084	-0.9084
0.645556	-0.90877	-0.90877	-0.90877	-0.90877
0.392222	-0.92339	-0.92339	-0.92339	-0.92339
0.46	-0.92831	-0.92831	-0.92831	-0.92831
0.766	-0.92913	-0.92913	-0.92913	-0.92913
0.504545	-0.94867	-0.94867	-0.94867	-0.94867
0.40125	-0.95063	-0.95063	-0.95063	-0.95063
0.54	-0.95595	-0.95595	-0.95595	-0.95595
0.53	-0.96182	-0.96182	-0.96182	-0.96182
0.500909	-0.9623	-0.9623	-0.9623	-0.9623
0.9075	-0.96396	-0.96396	-0.96396	-0.96396
0.476667	-0.96725	-0.96725	-0.96725	-0.96725
0.62	-0.96726	-0.96726	-0.96726	-0.96726
0.345	-0.977	-0.977	-0.977	-0.977
0.568889	-0.98238	-0.98238	-0.98238	-0.98238
0.441429	-0.98674	-0.98674	-0.98674	-0.98674
0.515	-0.99298	-0.99298	-0.99298	-0.99298
0.218333	-0.99445	-0.99445	-0.99445	-0.99445
0.769	-0.99491	-0.99491	-0.99491	-0.99491
0.536667	-0.99686	-0.99686	-0.99686	-0.99686
0.630833	-0.99905	-0.99905	-0.99905	-0.99905
0.507778	-1.01039	-1.01039	-1.01039	-1.01039
0.595	-1.01168	-1.01168	-1.01168	-1.01168
0.962222	-1.02725	-1.02725	-1.02725	-1.02725
0.4	-1.0292	-1.0292	-1.0292	-1.0292
0.560909	-1.03244	-1.03244	-1.03244	-1.03244
0.942308	-1.04012	-1.04012	-1.04012	-1.04012
0.646	-1.0445	-1.0445	-1.0445	-1.0445
0.615	-1.04601	-1.04601	-1.04601	-1.04601
0.05875	-1.05053	-1.05053	-1.05053	-1.05053
0.744444	-1.06856	-1.06856	-1.06856	-1.06856
0.8175	-1.06883	-1.06883	-1.06883	-1.06883
0.741111	-1.07231	-1.07231	-1.07231	-1.07231
0.137778	-1.07813	-1.07813	-1.07813	-1.07813
0.351111	-1.0785	-1.0785	-1.0785	-1.0785
0.429091	-1.08313	-1.08313	-1.08313	-1.08313
0.89375	-1.09284	-1.09284	-1.09284	-1.09284
0.351818	-1.09665	-1.09665	-1.09665	-1.09665
0.580909	-1.0994	-1.0994	-1.0994	-1.0994
0.6725	-1.10616	-1.10616	-1.10616	-1.10616
0.291667	-1.11165	-1.11165	-1.11165	-1.11165
0.908333	-1.11166	-1.11166	-1.11166	-1.11166
0.451	-1.11847	-1.11847	-1.11847	-1.11847
0.875556	-1.11876	-1.11876	-1.11876	-1.11876
0.83375	-1.12165	-1.12165	-1.12165	-1.12165
0.385455	-1.13308	-1.13308	-1.13308	-1.13308
0.616	-1.14918	-1.14918	-1.14918	-1.14918
0.645556	-1.15766	-1.15766	-1.15766	-1.15766
0.120833	-1.16862	-1.16862	-1.16862	-1.16862
0.672727	-1.18726	-1.18726	-1.18726	-1.18726
0.785	-1.18915	-1.18915	-1.18915	-1.18915
0.310833	-1.18988	-1.18988	-1.18988	-1.18988
0.64	-1.20514	-1.20514	-1.20514	-1.20514
0.259	-1.20532	-1.20532	-1.20532	-1.20532
0.628	-1.20585	-1.20585	-1.20585	-1.20585
0.775833	-1.21034	-1.21034	-1.21034	-1.21034
0.364444	-1.21219	-1.21219	-1.21219	-1.21219
0.0618182	-1.21462	-1.21462	-1.21462	-1.21462
0.532727	-1.21582	-1.21582	-1.21582	-1.21582
0.658	-1.22075	-1.22075	-1.22075	-1.22075
0.516667	-1.22575	-1.22575	-1.22575	-1.22575
0.867778	-1.22723	-1.22723	-1.22723	-1.22723
0.638	-1.24131	-1.24131	-1.24131	-1.24131
0.314	-1.24476	-1.24476	-1.24476	-1.24476
0.498571	-1.24607	-1.24607	-1.24607	-1.24607
0.425	-1.24999	-1.24999	-1.24999	-1.24999
0.393333	-1.26294	-1.26294	-1.26294	-1.26294
0.7725	-1.26524	-1.26524	-1.26524	-1.26524
0.920833	-1.28747	-1.28747	-1.28747	-1.28747
0.872727	-1.29909	-1.29909	-1.29909	-1.29909
0.754667	-1.3006	-1.3006	-1.3006	-1.3006
0.648889	-1.30393	-1.30393	-1.30393	-1.30393
0.427778	-1.3261	-1.3261	-1.3261	-1.3261
0.514286	-1.34144	-1.34144	-1.34144	-1.34144
0.697143	-1.35064	-1.35064	-1.35064	-1.35064
0.712727	-1.35232	-1.35232	-1.35232	-1.35232
0.454444	-1.35267	-1.35267	-1.35267	-1.35267
0.65	-1.35303	-1.35303	-1.35303	-1.35303
0.828	-1.35947	-1.35947	-1.35947	-1.35947
0.271667	-1.37606	-1.37606	-1.37606	-1.37606
0.718333	-1.38086	-1.38086	-1.38086	-1.38086
0.664167	-1.40162	-1.40162	-1.40162	-1.40162
0.974667	-1.40602	-1.40602	-1.40602	-1.40602
0.483	-1.4169	-1.4169	-1.4169	-1.4169
0.942727	-1.42319	-1.42319	-1.42319	-1.42319
0.53125	-1.42755	-1.42755	-1.42755	-1.42755
0.609091	-1.43756	-1.43756	-1.43756	-1.43756
0.26	-1.44949	-1.44949	-1.44949	-1.44949
0.2225	-1.45837	-1.45837	-1.45837	-1.45837
0.808889	-1.47914	-1.47914	-1.47914	-1.47914
0.4025	-1.47994	-1.47994	-1.47994	-1.47994
0.766	-1.48183	-1.48183	-1.48183	-1.48183
0.560909	-1.49131	-1.49131	-1.49131	-1.49131
0.224	-1.49447	-1.49447	-1.49447	-1.49447
0.970833	-1.49695	-1.49695	-1.49695	-1.49695
0.51125	-1.49713	-1.49713	-1.49713	-1.49713
0.821111	-1.52743	-1.52743	-1.52743	-1.52743
0.505556	-1.54493	-1.54493	-1.54493	-1.54493
0.39875	-1.55071	-1.55071	-1.55071	-1.55071
0.453333	-1.57853	-1.57853	-1.57853	-1.57853
0.015	-1.57854	-1.57854	-1.57854	-1.57854
0.131111	-1.58622	-1.58622	-1.58622	-1.58622
0.454167	-1.59744	-1.59744	-1.59744	-1.59744
0.291667	-1.60596	-1.60596	-1.60596	-1.60596
0.405556	-1.61491	-1.61491	-1.61491	-1.61491
0.690667	-1.61719	-1.61719	-1.61719	-1.61719
0.9225	-1.634	-1.634	-1.634	-1.634
0.01125	-1.6675	-1.6675	-1.6675	-1.6675
0.825	-1.669	-1.669	-1.669	-1.669
0.85	-1.68251	-1.68251	-1.68251	-1.68251
0.5975	-1.69121	-1.69121	-1.69121	-1.69121
0.238333	-1.70014	-1.70014	-1.70014	-1.70014
0.427778	-1.72682	-1.72682	-1.72682	-1.72682
0.5075	-1.74039	-1.74039	-1.74039	-1.74039
0.394167	-1.75272	-1.75272	-1.75272	-1.75272
0.205714	-1.75563	-1.75563	-1.75563	-1.75563
0.548	-1.78049	-1.78049	-1.78049	-1.78049
0.583636	-1.78186	-1.78186	-1.78186	-1.78186
0.487	-1.80668	-1.80668	-1.80668	-1.80668
0.82	-1.80989	-1.80989	-1.80989	-1.80989
0.9225	-1.81101	-1.81101	-1.81101	-1.81101
0.212727	-1.82022	-1.82022	-1.82022	-1.82022
0.4	-1.82181	-1.82181	-1.82181	-1.82181
0.873333	-1.82883	-1.82883	-1.82883	-1.82883
0.58	-1.85179	-1.85179	-1.85179	-1.85179
0.4325	-1.87582	-1.87582	-1.87582	-1.87582
0.973333	-1.88309	-1.88309	-1.88309	-1.88309
0.695556	-1.90135	-1.90135	-1.90135
0.687778	-1.92682	-1.92682	-1.92682
0.659091	-1.93314	-1.93314	-1.93314
0.752	-1.93456	-1.93456	-1.93456
0.973333	-1.93829	-1.93829	-1.93829
0.4675	-1.94539	-1.94539	-1.94539
0.424167	-1.94721	-1.94721	-1.94721
0.545556	-1.95332	-1.95332	-1.95332
0.195455	-1.97442	-1.97442	-1.97442
0.227333	-1.98135	-1.98135	-1.98135
0.908889	-1.98437	-1.98437	-1.98437
0.156667	-1.99317	-1.99317	-1.99317
0.580769	-1.99794	-1.99794	-1.99794
0.981667	-2.00342	-2.00342	-2.00342
0.926667	-2.00543	-2.00543	-2.00543
0.705	-2.03015	-2.03015	-2.03015
0.404444	-2.04904	-2.04904	-2.04904
0.822	-2.04981	-2.04981	-2.04981
0.79375	-2.0534	-2.0534	-2.0534
0.894545	-2.05501	-2.05501	-2.05501
0.607778	-2.07741	-2.07741	-2.07741
0.830667	-2.08254	-2.08254	-2.08254
0.193636	-2.09762	-2.09762	-2.09762
0.613	-2.10711	-2.10711	-2.10711
0.69	-2.1147	-2.1147	-2.1147
0.805	-2.12525	-2.12525	-2.12525
0.6975	-2.14314	-2.14314	-2.14314
0.103	-2.1441	-2.1441	-2.1441
0.308182	-2.14586	-2.14586	-2.14586
0.773	-2.14724	-2.14724	-2.14724
0.217273	-2.14858	-2.14858	-2.14858
0.400833	-2.15489	-2.15489	-2.15489
0.72	-2.17037	-2.17037	-2.17037
0.877273	-2.18372	-2.18372	-2.18372
0.3025	-2.18521	-2.18521	-2.18521
0.505556	-2.19053	-2.19053	-2.19053
0.23875	-2.2039	-2.2039	-2.2039
0.368333	-2.21996	-2.21996	-2.21996
0.724	-2.22481	-2.22481	-2.22481
0.889167	-2.23034	-2.23034	-2.23034
0.746364	-2.23511	-2.23511	-2.23511
0.4775	-2.24119	-2.24119	-2.24119
0.526667	-2.26832	-2.26832	-2.26832
0.175	-2.26971	-2.26971	-2.26971
0.705	-2.27331	-2.27331	-2.27331
0.128333	-2.30061	-2.30061	-2.30061
0.702222	-2.30673	-2.30673	-2.30673
0.5925	-2.31909	-2.31909	-2.31909
0.537778	-2.32075	-2.32075	-2.32075
0.0190909	-2.33389	-2.33389	-2.33389
0.309091	-2.34752	-2.34752	-2.34752
0.776	-2.35946	-2.35946	-2.35946
0.343333	-2.36741	-2.36741	-2.36741
0.733333	-2.37418	-2.37418	-2.37418
0.4225	-2.37553	-2.37553	-2.37553
0.91375	-2.40387	-2.40387	-2.40387
0.194167	-2.41058	-2.41058	-2.41058
0.748182	-2.41141	-2.41141	-2.41141
0.530833	-2.41365	-2.41365	-2.41365
0.324	-2.43306	-2.43306	-2.43306
0.27625	-2.43587	-2.43587	-2.43587
0.820833	-2.44108	-2.44108	-2.44108
0.155	-2.44614	-2.44614	-2.44614
0.325833	-2.44889	-2.44889	-2.44889
0.661667	-2.45198	-2.45198	-2.45198
0.504444	-2.46872	-2.46872	-2.46872
0.291111	-2.48141	-2.48141	-2.48141
0.66	-2.49464	-2.49464	-2.49464
0.759167	-2.51537	-2.51537	-2.51537
0.606667	-2.524	-2.524	-2.524
0.44	-2.53019	-2.53019	-2.53019
0.54	-2.54131	-2.54131	-2.54131
0.487692	-2.54408	-2.54408	-2.54408
0.303333	-2.54538	-2.54538	-2.54538
0.308333	-2.58068	-2.58068	-2.58068
0.208889	-2.58874	-2.58874	-2.58874
0.583333	-2.58992	-2.58992	-2.58992
0.158182	-2.60153	-2.60153	-2.60153
0.8375	-2.61465	-2.61465	-2.61465
0.7225	-2.61699	-2.61699	-2.61699
0.545	-2.61794	-2.61794	-2.61794
0.648333	-2.62874	-2.62874	-2.62874
0.853333	-2.64905	-2.64905	-2.64905
0.54	-2.65603	-2.65603	-2.65603
0.474286	-2.68353	-2.68353	-2.68353
0.319167	-2.69539	-2.69539	-2.69539
0.579167	-2.69989	-2.69989	-2.69989
0.2775	-2.70573	-2.70573	-2.70573
0.63	-2.72549	-2.72549	-2.72549
0.929167	-2.74344	-2.74344	-2.74344
0.8225	-2.74486	-2.74486	-2.74486
0.428182	-2.75603	-2.75603	-2.75603
0.801667	-2.77055	-2.77055	-2.77055
0.743333	-2.78015	-2.78015	-2.78015
0.0427273	-2.79161	-2.79161	-2.79161
0.4675	-2.7934	-2.7934	-2.7934
0.43	-2.86148	-2.86148	-2.86148
0.804167	-2.87341	-2.87341	-2.87341
0.428182	-2.87414	-2.87414	-2.87414
0.5925	-2.88797	-2.88797	-2.88797
0.640909	-2.9146	-2.9146	-2.9146
0.848	-2.93911	-2.93911	-2.93911
0.313	-2.94809	-2.94809	-2.94809
0.465	-2.94855	-2.94855	-2.94855
0.385	-2.95823	-2.95823	-2.95823
0.243636	-2.96378	-2.96378	-2.96378
0.211667	-2.96778	-2.96778	-2.96778
0.468182	-3.00164	-3.00164	-3.00164
0.52125	-3.00229	-3.00229	-3.00229
0.706364	-3.00408	-3.00408	-3.00408
0.405556	-3.01526	-3.01526	-3.01526
0.495385	-3.03546	-3.03546	-3.03546
0.2625	-3.04151	-3.04151	-3.04151
0.131	-3.05063	-3.05063	-3.05063
0.259333	-3.06838	-3.06838	-3.06838
0.670833	-3.11101	-3.11101	-3.11101
0.625455	-3.1221	-3.1221	-3.1221
0.698	-3.13463	-3.13463	-3.13463
0.281111	-3.14176	-3.14176	-3.14176
0.305	-3.15127	-3.15127	-3.15127
0.373	-3.15392	-3.15392	-3.15392
0.0744444	-3.16158	-3.16158	-3.16158
0.952	-3.16965	-3.16965	-3.16965
0.225556	-3.22603	-3.22603	-3.22603
0.726667	-3.23485	-3.23485	-3.23485
0.800833	-3.25352	-3.25352	-3.25352
0.143333	-3.30535	-3.30535	-3.30535
0.433333	-3.32016	-3.32016	-3.32016
0.7525	-3.33515	-3.33515	-3.33515
0.4675	-3.33848	-3.33848	-3.33848
0.628182	-3.35998	-3.35998	-3.35998
0.161	-3.39536	-3.39536	-3.39536
0.354167	-3.41044	-3.41044	-3.41044
0.351667	-3.41707	-3.41707	-3.41707
0.395	-3.42146	-3.42146	-3.42146
0.199091	-3.44016	-3.44016	-3.44016
0.328667	-3.46574	-3.46574	-3.46574
0.574	-3.48016	-3.48016	-3.48016
0.871	-3.49763	-3.49763	-3.49763
0.19625	-3.52698	-3.52698	-3.52698
0.64875	-3.53353	-3.53353	-3.53353
0.144667	-3.54433	-3.54433	-3.54433
0.729	-3.55811	-3.55811	-3.55811
0.520833	-3.64599	-3.64599	-3.64599
0.430769	-3.64727	-3.64727	-3.64727
0.24	-3.71055	-3.71055	-3.71055
0.221818	-3.71507	-3.71507	-3.71507
0.547778	-3.73863	-3.73863	-3.73863
0.654167	-3.73887	-3.73887
0.976667	-3.75732	-3.75732
0.745455	-3.79565	-3.79565
0.514444	-3.79611	-3.79611
0.358	-3.80056	-3.80056
0.50625	-3.85585	-3.85585
0.508182	-3.85825	-3.85825
0.508889	-3.88498	-3.88498
0.58	-3.89352	-3.89352
0.405	-3.90097	-3.90097
0.143636	-3.909	-3.909
0.445455	-3.91577	-3.91577
0.111538	-3.93272	-3.93272
0.278	-3.94251	-3.94251
0.563	-3.94509	-3.94509
0.694	-3.97539	-3.97539
0.407	-3.98313	-3.98313
0.3825	-4.06852	-4.06852
0.553333	-4.07719	-4.07719
0.294167	-4.09008	-4.09008
0.496667	-4.09531	-4.09531
0.232727	-4.11103	-4.11103
0.805833	-4.11992	-4.11992
0.597778	-4.13192	-4.13192
0.501818	-4.16487	-4.16487
0.39	-4.17886	-4.17886
0.64625	-4.19622	-4.19622
0.512727	-4.20141	-4.20141
0.212222	-4.2022	-4.2022
0.162308	-4.22895	-4.22895
0.154545	-4.27908	-4.27908
0.704444	-4.35147	-4.35147
0.331111	-4.36886	-4.36886
0.410833	-4.43835	-4.43835
0.874	-4.47935	-4.47935
0.498889	-4.48155	-4.48155
0.836364	-4.50033	-4.50033
0.359167	-4.52396	-4.52396
0.175833	-4.54972	-4.54972
0.973	-4.55029	-4.55029
0.740909	-4.55232	-4.55232
0.545833	-4.55303	-4.55303
0.47	-4.64568	-4.64568
0.43	-4.64693	-4.64693
0.506667	-4.65542	-4.65542
0.837273	-4.71252	-4.71252
0.885833	-4.73232	-4.73232
0.52	-4.77238	-4.77238
0.355556	-4.8173	-4.8173
0.366667	-4.81741	-4.81741
0.402308	-4.83515	-4.83515
0.14	-4.856	-4.856
0.508182	-4.86303	-4.86303
0.446364	-4.86911	-4.86911
0.596	-4.95011	-4.95011
0.4475	-5.02581	-5.02581
0.73	-5.0723	-5.0723
0.369	-5.07501	-5.07501
0.474167	-5.08155	-5.08155
0.395556	-5.09597	-5.09597
0.447273	-5.10585	-5.10585
0.974545	-5.12438	-5.12438
0.4	-5.12842	-5.12842
0.4025	-5.13383	-5.13383
0.643636	-5.16486	-5.16486
0.356667	-5.19182	-5.19182
0.534444	-5.22749	-5.22749
0.465	-5.24087	-5.24087
0.513636	-5.26682	-5.26682
0.980833	-5.27382	-5.27382
0.76	-5.3059	-5.3059
0.546667	-5.32309	-5.32309
0.465556	-5.33704	-5.33704
0.113077	-5.3849	-5.3849
0.325556	-5.39152	-5.39152
0.445455	-5.41319	-5.41319
0.307778	-5.47926	-5.47926
0.241333	-5.58861	-5.58861
0.387273	-5.59344	-5.59344
0.256	-5.60937	-5.60937
0.293333	-5.63358	-5.63358
0.30625	-5.64927	-5.64927
0.382727	-5.68461	-5.68461
0.358889	-5.68843	-5.68843
0.265	-5.70901	-5.70901
0.1825	-5.74816	-5.74816
0.375	-5.8992	-5.8992
0.947778	-5.99393	-5.99393
0.765333	-6.09376	-6.09376
0.163077	-6.17323	-6.17323
0.0541667	-6.24846	-6.24846
0.387273	-6.29075	-6.29075
0.537	-6.33491	-6.33491
0.84	-6.38426	-6.38426
0.155833	-6.55009	-6.55009
0.613333	-6.58935	-6.58935
0.22	-6.65496	-6.65496
0.831429	-6.67909	-6.67909
0.485	-6.77184	-6.77184
0.308333	-6.7882	-6.7882
0.33	-6.80072	-6.80072
0.318333	-6.80831	-6.80831
0.725	-6.9299	-6.9299
0.325556	-6.951	-6.951
0.111667	-7.00159	-7.00159
0.64	-7.04006	-7.04006
0.688667	-7.13205	-7.13205
0.474444	-7.15464	-7.15464
0.216667	-7.17282	-7.17282
0.205833	-7.29236	-7.29236
0.239	-7.30579	-7.30579
0.0808333	-7.36293	-7.36293
0.3825	-7.78309	-7.78309
0.356667	-7.87642	-7.87642
0.678182	-7.89651	-7.89651
0.133333	-8.12902	-8.12902
0.0633333	-8.16865	-8.16865
0.435	-8.19399	-8.19399
0.275556	-8.30097
0.65125	-8.33693
0.890909	-8.48251
0.104167	-8.61609
0.290667	-8.69413
0.584615	-8.94464
0.385455	-8.96473
0.406667	-9.24782
0.139167	-9.41834
0.12125	-9.59159
0.197778	-9.63013
0.305	-9.70774
0.527273	-9.77206
0.20875	-9.8053
0.366667	-9.90169
0.589091	-10.0445
0.0393333	-10.1224
0.5125	-10.8672
0.691111	-11.0114
0.421667	-11.7983
0.245	-12.0038
0.1825	-12.0563
0.645455	-12.2416
0.433	-12.7351
0.057	-12.7938
0.236364	-13.4433
0.227273	-13.4628
0.184	-13.8583
0.41	-17.5168
0.2425	-26.7319
